1 **Molecular Architecture of Early Dissemination**  
2 **and Massive Second Wave of the SARS-CoV-2 Virus in a**  
3 **Major Metropolitan Area**

4  
5 **Running Title: Two waves of COVID-19 disease in Houston, Texas**

6  
7 **S. Wesley Long,<sup>a,b,1</sup> Randall J. Olsen,<sup>a,b,1</sup> Paul A. Christensen,<sup>a,1</sup> David W.**  
8 **Bernard,<sup>a,b</sup> James J. Davis,<sup>c,d</sup> Maulik Shukla,<sup>c,d</sup> Marcus Nguyen,<sup>c,d</sup> Matthew**  
9 **Ojeda Saavedra,<sup>a</sup> Prasanti Yerramilli,<sup>a</sup> Layne Pruitt,<sup>a</sup> Sishir Subedi,<sup>a</sup> Hung-**  
10 **Che Kuo,<sup>e</sup> Heather Hendrickson,<sup>a</sup> Ghazaleh Eskandari,<sup>a</sup> Hoang A. T.**  
11 **Nguyen,<sup>a</sup> J. Hunter Long,<sup>a</sup> Muthiah Kumaraswami,<sup>a</sup> Jule Goike,<sup>e</sup> Daniel**  
12 **Boutz,<sup>f</sup> Jimmy Gollihar,<sup>a,f</sup> Jason S. McLellan,<sup>e</sup> Chia-Wei Chou,<sup>e</sup> Kamyab**  
13 **Javanmardi,<sup>e</sup> Ilya J. Finkelstein,<sup>e,g</sup> and James M. Musser<sup>a,b,#</sup>**

14  
15 <sup>a</sup>Center for Molecular and Translational Human Infectious Diseases Research,  
16 Department of Pathology and Genomic Medicine, Houston Methodist Research  
17 Institute and Houston Methodist Hospital, 6565 Fannin Street, Houston, Texas  
18 77030

19 <sup>b</sup>Departments of Pathology and Laboratory Medicine, and Microbiology and  
20 Immunology, Weill Cornell Medical College, 1300 York Avenue, New York, New  
21 York 10065

22 <sup>c</sup>Consortium for Advanced Science and Engineering, University of Chicago, 5801  
23 South Ellis Avenue, Chicago, Illinois, 60637

24 <sup>d</sup>Computing, Environment and Life Sciences, Argonne National Laboratory, 9700  
25 South Cass Avenue, Lemont, Illinois 60439

26 <sup>e</sup>Department of Molecular Biosciences and Institute of Molecular Biosciences,  
27 The University of Texas at Austin, Austin, Texas 78712

28 <sup>f</sup>CCDC Army Research Laboratory-South, University of Texas, Austin, Texas 78712

29 <sup>g</sup>Center for Systems and Synthetic Biology, University of Texas at Austin, Austin,  
30 Texas 78712

31

32 <sup>1</sup>S.W.L., R.J.O., and P.A.C. contributed equally to this article. The order of co-first  
33 authors was determined by discussion and mutual agreement between the three  
34 co-first authors.

35

36 <sup>#</sup>Address correspondence to: James M. Musser, M.D., Ph.D., Department of  
37 Pathology and Genomic Medicine, Houston Methodist Research Institute, 6565  
38 Fannin Street, Suite B490, Houston, Texas 77030. Tel: 713.441.5890, E-mail:  
39 [jmmusser@houstonmethodist.org](mailto:jmmusser@houstonmethodist.org).

40

41

42

43

44

45

46

47

48

49

50

51

52

53

54

55

56

57

58

59

60

61

62

63

64

65

66 **ABSTRACT** We sequenced the genomes of 5,085 SARS-CoV-2 strains  
67 causing two COVID-19 disease waves in metropolitan Houston, Texas, an  
68 ethnically diverse region with seven million residents. The genomes were  
69 from viruses recovered in the earliest recognized phase of the pandemic in  
70 Houston, and an ongoing massive second wave of infections. The virus  
71 was originally introduced into Houston many times independently. Virtually  
72 all strains in the second wave have a Gly614 amino acid replacement in the  
73 spike protein, a polymorphism that has been linked to increased  
74 transmission and infectivity. Patients infected with the Gly614 variant  
75 strains had significantly higher virus loads in the nasopharynx on initial  
76 diagnosis. We found little evidence of a significant relationship between  
77 virus genotypes and altered virulence, stressing the linkage between  
78 disease severity, underlying medical conditions, and host genetics. Some  
79 regions of the spike protein - the primary target of global vaccine efforts -  
80 are replete with amino acid replacements, perhaps indicating the action of  
81 selection. We exploited the genomic data to generate defined single amino  
82 acid replacements in the receptor binding domain of spike protein that,  
83 importantly, produced decreased recognition by the neutralizing  
84 monoclonal antibody CR30022. Our study is the first analysis of the  
85 molecular architecture of SARS-CoV-2 in two infection waves in a major  
86 metropolitan region. The findings will help us to understand the origin,  
87 composition, and trajectory of future infection waves, and the potential

88 **effect of the host immune response and therapeutic maneuvers on SARS-**  
89 **CoV-2 evolution.**

90

91 **IMPORTANCE** There is concern about second and subsequent waves of  
92 **COVID-19** caused by the SARS-CoV-2 coronavirus occurring in  
93 **communities globally that had an initial disease wave. Metropolitan**  
94 **Houston, Texas, with a population of 7 million, is experiencing a massive**  
95 **second disease wave that began in late May 2020. To understand SARS-**  
96 **CoV-2 molecular population genomic architecture, evolution, and**  
97 **relationship between virus genotypes and patient features, we sequenced**  
98 **the genomes of 5,085 SARS-CoV-2 strains from these two waves. Our study**  
99 **provides the first molecular characterization of SARS-CoV-2 strains**  
100 **causing two distinct COVID-19 disease waves.**

101

102 **KEYWORDS:** SARS-CoV-2, COVID-19 disease, genome sequencing, molecular  
103 population genomics, evolution

104

105 [Introduction]

106 **P**andemic disease caused by the severe acute respiratory syndrome  
107 coronavirus 2 (SARS-CoV-2) virus is now responsible for massive human  
108 morbidity and mortality worldwide (1-5). The virus was first documented to cause  
109 severe respiratory infections in Wuhan, China, beginning in late December 2019  
110 (6-9). Global dissemination occurred extremely rapidly and has affected major  
111 population centers on most continents (10, 11). In the United States, the Seattle  
112 and the New York City (NYC) regions have been especially important centers of  
113 COVID-19 disease caused by SARS-CoV-2. For example, as of August 19,  
114 2020, there were 227,419 confirmed SARS-CoV-2 cases in NYC, causing 56,831  
115 hospitalizations and 19,005 confirmed fatalities and 4,638 probable fatalities (12).  
116 Similarly, in Seattle and King County, 17,989 positive patients and 696 deaths  
117 have been reported as of August 18, 2020 (13).

118       The Houston metropolitan area is the fourth largest and most ethnically  
119 diverse city in the United States, with a population of approximately 7 million  
120 (14, 15). The 2,400-bed Houston Methodist health system has seven hospitals  
121 and serves a large, multiethnic, and socioeconomically diverse patient population  
122 throughout greater Houston (13, 14). The first COVID-19 case in metropolitan  
123 Houston was reported on March 5, 2020 with community spread occurring one  
124 week later (16). Many of the first cases in our region were associated with  
125 national or international travel in areas known to have SARS-CoV-2 virus  
126 outbreaks (16). A central molecular diagnostic laboratory serving all Houston  
127 Methodist hospitals and our very early adoption of a molecular test for the SARS-

128 CoV-2 virus permitted us to rapidly identify positive patients and interrogate  
129 genomic variation among strains causing early infections in the greater Houston  
130 area. Our analysis of SARS-CoV-2 genomes causing disease in Houston has  
131 continued unabated since early March and is ongoing. Genome sequencing and  
132 related efforts were expanded extensively in late May as we recognized that a  
133 prominent second wave was underway (**Figure 1**).

134 Here, we report that SARS-CoV-2 was introduced to the Houston area  
135 many times, independently, from diverse geographic regions, with virus  
136 genotypes representing genetic clades causing disease in Europe, Asia, South  
137 America and elsewhere in the United States. There was widespread community  
138 dissemination soon after COVID-19 cases were reported in Houston. Strains with  
139 a Gly614 amino acid replacement in the spike protein, a polymorphism that has  
140 been linked to increased transmission and *in vitro* cell infectivity, increased  
141 significantly over time and caused virtually all COVID-19 cases in the massive  
142 second disease wave. Patients infected with strains with the Gly614 variant had  
143 significantly higher virus loads in the nasopharynx on initial diagnosis. Some  
144 naturally occurring single amino acid replacements in the receptor binding  
145 domain of spike protein resulted in decreased reactivity with a neutralizing  
146 monoclonal antibody, consistent with the idea that some virus variants arise due  
147 to host immune pressure.

148

## 149 **RESULTS**

150           **Description of metropolitan Houston.** Houston, Texas, is located in the  
151 southwestern United States, 50 miles inland from the Gulf of Mexico. It is the  
152 most ethnically diverse city in the United States (14). Metropolitan Houston is  
153 comprised predominantly of Harris County plus parts of eight contiguous  
154 surrounding counties. In the aggregate, the metropolitan area includes 9,444  
155 square miles. The estimated population size of metropolitan Houston is 7 million  
156 (<https://www.houston.org/houston-data>).

157           **Epidemic curve characteristics over two disease waves.** The first  
158 confirmed case of COVID-19 in the Houston metropolitan region was reported on  
159 March 5, 2020 (16), and the first confirmed case diagnosed in Houston Methodist  
160 hospitals was reported on March 6, 2020. The epidemic curve indicated a first  
161 wave of COVID-19 cases that peaked around April 11-15, followed by a decline  
162 in cases until May 11. Soon thereafter, the slope of the case curve increased with  
163 a very sharp uptick in confirmed cases beginning on June 12 (**Figure 1B**). We  
164 consider May 11 as the transition between waves, as this date is the inflection  
165 point of the cumulative new cases curve and had the absolute lowest number of  
166 new cases in the mid-May time period. Thus, for the data presented herein, wave  
167 1 is defined as March 5 through May 11, 2020, and wave 2 is defined as May 12  
168 through July 7, 2020. Epidemiologic trends within the Houston Methodist Hospital  
169 population were mirrored by data from Harris County and the greater  
170 metropolitan Houston region (**Figure 1A**). Through the 7<sup>th</sup> of July, 25,366  
171 COVID-19 cases were reported in Houston, 37,776 cases in Harris County, and  
172 53,330 in metropolitan Houston, including 9,823 cases in Houston Methodist



173 facilities (inpatients and outpatients) (<https://www.tmc.edu/coronavirus->  
174 [updates/infection-rate-in-the-greater-houston-area/](https://www.tmc.edu/coronavirus-) and  
175 <https://harriscounty.maps.arcgis.com/apps/opstdashboard/index.html#/c0de71f8e>  
176 [a484b85bb5efcb7c07c6914](https://harriscounty.maps.arcgis.com/apps/opstdashboard/index.html#/c0de71f8e)).

177 During the first wave (early March through May 11), 11,476 COVID-19  
178 cases were reported in Houston, including 1,729 cases in the Houston Methodist  
179 Hospital system. Early in the first wave (from March 5 through March 30, 2020),  
180 we tested 3,080 patient specimens. Of these, 406 (13.2%) samples were positive  
181 for SARS-CoV-2, representing 40% (358/898) of all confirmed cases in  
182 metropolitan Houston during that time period. As our laboratory was the first  
183 hospital-based facility to have molecular testing capacity for SARS-CoV-2  
184 available on site, our strain samples are likely representative of COVID-19  
185 infections during the first wave.

186 For the entire study period (March 5 through July 7, 2020), we tested  
187 68,418 specimens from 55,800 patients. Of these, 9,121 patients (16.4%) had a  
188 positive test result, representing 17.1% (9,121/53,300) of all confirmed cases in  
189 metropolitan Houston. Thus, our strain samples are also representative of those  
190 responsible for COVID-19 infections in the massive second wave.

191 To test the hypothesis that, on average, the two waves affected different  
192 groups of patients, we analyzed individual patient characteristics (hospitalized  
193 and non-hospitalized) in each wave. Consistent with this hypothesis, we found  
194 significant differences in the COVID-19 patients in each wave (**Table S1**). For  
195 example, patients in the second wave were significantly younger, had fewer

196 comorbidities, were more likely to be Hispanic/Latino (by self-report), and lived in  
197 zip codes with lower median incomes (**Table S1**). A detailed analysis of the  
198 characteristics of patients hospitalized in Houston Methodist facilities in the two  
199 waves has recently been published (17).

200 **SARS-CoV-2 genome sequencing and phylogenetic analysis.** To  
201 investigate the genomic architecture of the virus across the two waves, we  
202 sequenced the genomes of 5,085 SARS-CoV-2 strains dating to the earliest time  
203 of confirmed COVID-19 cases in Houston. Analysis of SARS-CoV-2 strains  
204 causing disease in the first wave (March 5 through May 11) identified the  
205 presence of many diverse virus genomes that, in the aggregate, represent the  
206 major clades identified globally to date (**Figure 1B**). Clades G, GH, GR, and S  
207 were the four most abundantly represented phylogenetic groups (**Figure 1B**).  
208 Strains with the Gly614 amino acid variant in spike protein represented 82% of  
209 the SARS-CoV-2 strains in wave 1, and 99.9% in wave 2 ( $p < 0.0001$ ; Fisher's  
210 exact test) (**Figure 1B**). This spike protein variant is characteristic of clades G,  
211 GH, and GR. Importantly, strains with the Gly614 variant represented only 71%  
212 of the specimens sequenced in March, the early part of wave 1 (**Figure 1B**). We  
213 attribute the decrease in strains with this variant observed in the first two weeks  
214 of March (**Figure 1B**) to fluctuation caused by the relatively fewer COVID-19  
215 cases occurring during this period.

216 **Relating spatiotemporal genome analysis with virus genotypes over**  
217 **two disease waves.** We examined the spatial and temporal mapping of genomic  
218 data to investigate community spread during wave 1 (**Figure 2**). Rapid and

219 widespread community dissemination occurred soon after the initial COVID-19  
220 cases were reported in Houston. The heterogenous virus genotypes present very  
221 early in wave 1 indicate that multiple strains independently entered metropolitan  
222 Houston, rather than introduction and spread of a single strain. An important  
223 observation was that strains of most of the individual subclades were distributed  
224 over broad geographic areas (**Figure S1**). These findings are consistent with the  
225 known ability of SARS-CoV-2 to spread very rapidly from person to person.

226 **Relationship between virus clades, clinical characteristics of infected**  
227 **patients, and additional metadata.** It is possible that SARS-CoV-2 genome  
228 subtypes have different clinical characteristics, analogous to what is believed to  
229 have occurred with Ebola virus (18-20) and known to occur for other pathogenic  
230 microbes (21). As an initial examination of this issue in SARS-CoV-2, we tested  
231 the hypothesis that patients with disease severe enough to warrant  
232 hospitalization were infected with a non-random subset of virus genotypes. We  
233 also examined the association between virus clades and disease severity based  
234 on overall mortality, highest level of required care (intensive care unit,  
235 intermediate care unit, inpatient or outpatient), need for mechanical ventilation,  
236 and length of stay. There was no simple relationship between virus clades and  
237 disease severity using these four indicators. Similarly, there was no simple  
238 relationship between virus clades and other metadata, such as sex, age, or  
239 ethnicity (**Figure S2**).

240 **Machine learning analysis.** Machine learning models can be used to  
241 identify complex relationships not revealed by statistical analyses. We built

242 machine learning models to test the hypothesis that virus genome sequence can  
243 predict patient outcomes including mortality, length of stay, level of care, ICU  
244 admission, supplemental oxygen use, and mechanical ventilation. Models to  
245 predict outcomes based on virus genome sequence alone resulted in low F1  
246 scores less than 50% (0.41 – 0.49) and regression models showed similarly low  
247  $R^2$  values (-0.01 – -0.20) (**Table S2**). F1 scores near 50% are indicative of  
248 classifiers that are performing similarly to random chance. The use of patient  
249 metadata alone to predict patient outcome improved the model's F1 scores by 5-  
250 10% (0.51 – 0.56) overall. The inclusion of patient metadata with virus genome  
251 sequence data improved most predictions of outcomes, compared to genome  
252 sequence alone, to 50% to 55% F1 overall (0.42 – 0.55) in the models (**Table**  
253 **S2**). The findings are indicative of two possibilities that are not mutually  
254 exclusive. First, patient metadata, such as age and sex, may provide more signal  
255 for the model to use and thus result in better accuracies. Second, the model's  
256 use of single nucleotide polymorphisms (SNPs) may have resulted in overfitting.  
257 Most importantly, no SNP predicted a significant difference in outcome. A table of  
258 classifier accuracy scores and performance information is provided in **Table S2**.

259 **Patient outcome and metadata correlations.** Overall, very few metadata  
260 categories correlated with patient outcomes (**Table S3**). Mortality was  
261 independently correlated with both Rh factor-positive blood type and increasing  
262 age, with Pearson correlation coefficients (PCC) equal to 0.22 and 0.27,  
263 respectively. This means that 22-27% of the variation in mortality can be  
264 predicted from Rh factor-positive blood type and patient age, respectively. Length

265 of stay correlated independently with increasing age (PCC=0.20). Positive Rh  
266 factor also correlated with ICU length of stay (PCC=0.20). All other patient  
267 metadata correlations to outcomes had PCC less than 0.20 (**Table S3**).

268 We further analyzed outcomes correlated to isolates from wave 1 and 2,  
269 and the presence of the Gly614 variant in spike protein. Being in wave 1 was  
270 independently correlated with mechanical ventilation days, overall length of stay,  
271 and ICU length of stay, with PCC equal to 0.20, 0.18, and 0.14, respectively.  
272 Importantly, the presence of the Gly614 variant did not correlate with patient  
273 outcomes (**Table S3**).

274 **Analysis of the *nsp12* polymerase gene.** The SARS-CoV-2 genome  
275 encodes an RNA-dependent RNA polymerase (RdRp, also referred to as Nsp12)  
276 used in virus replication (22-25). Two amino acid substitutions (Phe479Leu and  
277 Val556Leu) in RdRp each confer significant resistance *in vitro* to remdesivir, an  
278 adenosine analog (26). Remdesivir is inserted into RNA chains by RdRp during  
279 replication, resulting in premature termination of RNA synthesis and inhibition of  
280 virus replication. This compound has shown prophylactic and therapeutic benefit  
281 against MERS-CoV and SARS-CoV-2 experimental infection in rhesus  
282 macaques (27, 28). Recent reports indicate that remdesivir has therapeutic  
283 benefit in some COVID-19 hospitalized patients (29-33), leading it to be now  
284 widely used in patients worldwide. Thus, it may be important to understand  
285 variation in RdRp in large strain samples.

286 To acquire data about allelic variation in the *nsp12* gene, we analyzed our  
287 5,085 virus genomes. The analysis identified 265 SNPs, including 140

288 nonsynonymous (amino acid-altering) SNPs, resulting in amino acid  
289 replacements throughout the protein (**Table 1, Figure 3, Figure 4, Figure S3,**  
290 **and Figure S4**). The most common amino acid change was Pro322Leu,  
291 identified in 4,893 of the 5,085 (96%) patient isolates. This amino acid  
292 replacement is common in genomes from clades G, GH, and GR, which are  
293 distinguished from other SARS-CoV-2 clades by the presence of the Gly614  
294 amino acid change in the spike protein. Most of the other amino acid changes in  
295 RdRp were present in relatively small numbers of strains, and some have been  
296 identified in other isolates in a publicly available database (34). Five prominent  
297 exceptions included amino acid replacements: Ala15Val in 138 strains, Met462Ile  
298 in 59 strains, Met600Ile in 75 strains, Thr907Ile in 45 strains, and Pro917Ser in  
299 80 strains. All 75 Met600Ile strains were phylogenetically closely related  
300 members of clade G, and also had the Pro322Leu amino acid replacement  
301 characteristic of this clade (**Figure S3**). These data indicate that the Met600Ile  
302 change is likely the evolved state, derived from a precursor strain with the  
303 Pro322Leu replacement. Similarly, we investigated phylogenetic relationships  
304 among strains with the other four amino acid changes noted above. In all cases,  
305 the vast majority of strains with each amino acid replacement were found among  
306 individual subclades of strains (**Figure S3**).

307       Importantly, none of the observed amino acid polymorphisms in RdRp  
308 were located precisely at two sites known to cause *in vitro* resistance to  
309 remdesivir (26). Most of the amino acid changes are located distantly from the  
310 RNA-binding and catalytic sites (**Figure S4 and Table 1**). However,

311 replacements at six amino acid residues (Ala442Val, Ala448Val, Ala553Pro/Val,  
312 Gly682Arg, Ser758Pro, and Cys812Phe) may potentially interfere with either  
313 remdesivir binding or RNA synthesis. Four (Ala442Val, Ala448Val,  
314 Ala553Pro/Val, and Gly682Arg) of the six substitution sites are located  
315 immediately above the nucleotide-binding site, that is comprised of Lys544,  
316 Arg552, and Arg554 residues as shown by structural studies (**Figure 4**). The  
317 positions of these four variant amino acid sites are comparable to Val556 (**Figure**  
318 **4**), for which a Val556Leu mutation in SARS-CoV was identified to confer  
319 resistance to remdesivir *in vitro* (26). The other two substitutions (Ser758Pro and  
320 Cys812Phe) are inferred to be located either at, or in the immediate proximity of,  
321 the catalytic active site, that is comprised of three contiguous residues (Ser758,  
322 Asp759, and Asp760). A proline substitution we identified at Ser758 (Ser758Pro)  
323 is likely to negatively impact RNA synthesis. Although Cys812 is not directly  
324 involved in the catalysis of RNA synthesis, it is only 3.5 Å away from Asp760.  
325 The introduction of the bulkier phenylalanine substitution at Cys812 (Cys812Phe)  
326 may impair RNA synthesis. Consequently, these two substitutions are expected  
327 to detrimentally affect virus replication or fitness.

328 **Analysis of the gene encoding the spike protein.** The densely glycosylated  
329 spike protein of SARS-CoV-2 and its close coronavirus relatives binds directly to  
330 host-cell angiotensin-converting enzyme 2 (ACE2) receptors to enter host cells  
331 (35-37). Thus, the spike protein is a major translational research target, including  
332 intensive vaccine and therapeutic antibody (35-64). Analysis of the gene  
333 encoding the spike protein identified 470 SNPs, including 285 that produce

334 amino acid changes (**Table 2, Figure 5**). Forty-nine of these replacements  
335 (V11A, T51A, W64C, I119T, E156Q, S205A, D228G, L229W, P230T, N234D,  
336 I235T, T274A, A288V, E324Q, E324V, S325P, S349F, S371P, S373P, T385I,  
337 A419V, C480F, Y495S, L517F, K528R, Q628E, T632I, S708P, T719I, P728L,  
338 S746P, E748K, G757V, V772A, K814R, D843N, S884A, M902I, I909V, E918Q,  
339 S982L, M1029I, Q1142K, K1157M, Q1180R, D1199A, C1241F, C1247G, and  
340 V1268A) are not represented in a publicly available database (34) as of August  
341 19, 2020. Interestingly, 25 amino acid sites have three distinct variants (that is,  
342 the reference amino acid plus two additional variant amino acids), and five amino  
343 acid sites (amino acid positions 21, 27, 228, 936, and 1050) have four distinct  
344 variants represented in our sample of 5,085 genomes (**Table 2, Figure 5**).

345 We mapped the location of amino acid replacements onto a model of the  
346 full-length spike protein (35, 65) and observed that the substitutions are found in  
347 each subunit and domain of the spike (**Figure 6**). However, the distribution of  
348 amino acid changes is not uniform throughout the protein regions. For example,  
349 compared to some other regions of the spike protein, the receptor binding  
350 domain (RBD) has relatively few amino acid changes, and the frequency of  
351 strains with these substitutions is low, each occurring in fewer than 10 isolates.  
352 This finding is consistent with the functional constraints on RBD to mediate  
353 interaction with ACE2. In contrast, the periphery of the S1 subunit NTD contains  
354 a dense cluster of substituted residues, with some single amino acid  
355 replacements found in 10–20 isolates (**Table 2, Figure 5, Figure 6**). Clustering  
356 of amino acid changes in a distinct region of the spike protein may be a signal of



357 positive selection. Inasmuch as infected patients make antibodies against the  
358 NTD, we favor the idea that host immune selection is one force contributing to  
359 some of the amino acid variation in this region. One NTD substitution, H49Y, was  
360 found in 142 isolates. This position is not well exposed on the surface of the NTD  
361 and is likely not a result of immune pressure. The same is true for another highly  
362 represented substitution, F1052L. This substitution was observed in 167 isolates,  
363 and F1052 is buried within the core of the S2 subunit. The substitution observed  
364 most frequently in the spike protein in our sample is D614G, a change observed  
365 in 4,895 of the isolates. As noted above, strains with the Gly614 variant  
366 significantly increased in wave 2 compared to wave 1.

367 As observed with RdRp, the majority of strains with each single amino  
368 acid change in the spike protein were found on a distinct phylogenetic lineage  
369 (**Figure S5**), indicating identity by descent. A prominent exception is the  
370 Leu5Phe replacement that is present in all major clades, suggesting that this  
371 amino acid change arose multiple times independently or very early in the course  
372 of SARS-CoV-2 evolution. Finally, we note that examination of the phylogenetic  
373 distribution of strains with multiple distinct amino acid replacements at the same  
374 site (e.g., Arg21Ile/Lys/Thr, Ala27Ser/Thr/Val, etc.) revealed that they were  
375 commonly found in different genetic branches, consistent with independent origin  
376 (**Figure S5**).

377 **Cycle threshold (Ct) comparison of SARS-CoV-2 strains with either**  
378 **the Asp614 or Gly614 amino acid replacements in spike protein.** It has been  
379 reported that patients infected with strains having spike protein Gly614 variant

380 have, on average, higher virus loads on initial diagnosis (66-70). To determine if  
381 this is the case in Houston strains, we examined the cycle threshold (Ct) for  
382 every sequenced strain that was detected from a patient specimen using the  
383 SARS-CoV-2 Assay done by the Hologic Panther instrument. We identified a  
384 significant difference ( $p < 0.0001$ ) between the mean Ct value for strains with an  
385 Asp614 ( $n=102$ ) or Gly614 ( $n=812$ ) variant of the spike protein (**Figure 7**).  
386 Strains with Gly614 had a Ct value significantly lower than strains with the  
387 Asp614 variant, indicating that patients infected with the Gly614 strains had, on  
388 average, higher virus loads on initial diagnosis than patients infected by strains  
389 with the Asp614 variant (**Figure 7**). This observation is consistent with the  
390 conjecture that, on average, strains with the Gly614 variant are better able to  
391 disseminate.

392 **Characterization of recombinant proteins with single amino acid**  
393 **replacements in the receptor binding domain region of spike protein.** The  
394 RBD of spike protein binds the ACE2 surface receptor and is also targeted by  
395 neutralizing (36, 37, 41, 43-46, 48-62, 71). Thus, single amino acid replacements  
396 in this domain may have functional consequences that enhance virus fitness. To  
397 begin to test this idea, we expressed spike variants with the Asp614Gly  
398 replacement and 13 clinical RBD variants identified in our genome sequencing  
399 studies (**Figure 8, Table S4, S5**). All RBD variants were cloned into an  
400 engineered spike protein construct that stabilizes the prefusion state and  
401 increases overall expression yield (spike-6P, here referred to as spike) (64).

402 We first assessed the biophysical properties of spike-Asp614Gly, an  
403 amino acid polymorphism that is common globally and increased significantly in  
404 our wave 2 strain isolates. Pseudotyped viruses expressing spike-Gly614 have  
405 higher infectivity for host cells *in vitro* than spike-Asp614 (66, 67, 69, 72, 73). The  
406 higher infectivity of spike-Gly614 is correlated with increased stability and  
407 incorporation of the spike protein into the pseudovirion (73). We observed a  
408 higher expression level (**Figure 8A, B**) and increased thermostability for the  
409 spike protein construct containing this variant (**Figure 8C, D**). The size exclusion  
410 chromatography (SEC) elution profile of spike-Asp614 was indistinguishable from  
411 spike-Gly614, consistent with a trimeric conformation (**Figure 8A**). These results  
412 are broadly consistent with higher-resolution structural analyses of both spike  
413 variants.

414 Next, we purified and biophysically characterized 13 RBD mutants that  
415 each contain Gly614 and one additional single amino acid replacement we  
416 identified by genome sequencing our clinical samples (**Table S6**). All variants  
417 eluted as trimers, indicating the global structure, remained intact (**Figure 8** and  
418 **Figure S6**). However, several variants had reduced expression levels and  
419 virtually all had decreased thermostability relative to the variant that had only a  
420 D614G single amino acid replacement (**Figure 8D**). The A419V and A522V  
421 mutations were especially deleterious, reducing yield and precluding further  
422 downstream analysis (**Figure 8B**). We next assayed the affinity of the 11 highest-  
423 expressing spike variants for ACE2 and the neutralizing monoclonal antibody  
424 CR3022 via enzyme-linked immunosorbent assays (ELISAs) (**Figure 8E-G** and

425 **Table S6**). Most variants retained high affinity for the ACE2 surface receptor.  
426 However, importantly, three RBD variants (F338L, S373P, and R408T) had  
427 substantially reduced affinity for CR3022, a monoclonal antibody that disrupts the  
428 spike protein homotrimerization interface (63, 74). Notably, the S373P mutation  
429 is one amino acid away from the epitope recognized by CR3022. These results  
430 are consistent with the interpretation that some RBD mutants arising in COVID-  
431 19 patients may have increased ability to escape humoral immune pressure, but  
432 otherwise retain strong ACE2 binding affinity.

433

## 434 **DISCUSSION**

435 In this work we analyzed the molecular population genomics, sociodemographic,  
436 and medical features of two waves of COVID-19 disease occurring in  
437 metropolitan Houston, Texas, between early March and early July 2020. We also  
438 studied the biophysical and immunologic properties of some naturally occurring  
439 single amino acid changes in the spike protein RBD identified by sequencing the  
440 5,085 genomes. We discovered that the first COVID-19 wave was caused by a  
441 heterogenous array of virus genotypes assigned to several different clades. The  
442 majority of cases in the first wave are related to strains that caused widespread  
443 disease in European and Asian countries, as well as other localities. We  
444 conclude that the SARS-CoV-2 virus was introduced into Houston many times  
445 independently, likely by individuals who had traveled to or from different parts of  
446 the world, including other communities in the United States. In support of this  
447 conclusion, the first cases in metropolitan Houston were associated with a travel

448 history to a known COVID-19 region (16). The data are consistent with the fact  
449 that Houston is a large international city characterized by a multi-ethnic  
450 population and is a prominent transport hub with direct flights to major cities  
451 globally.

452 The second wave of COVID-19 cases also is characterized by SARS-  
453 CoV-2 strains with diverse genotypes. Virtually all cases in the second and  
454 ongoing disease wave were caused by strains with the Gly614 variant of spike  
455 protein (**Figure 1B**). Our data unambiguously demonstrate that strains with the  
456 Gly614 variant increased significantly in frequency in wave 2 relative to wave 1 in  
457 the Houston metropolitan region. This shift occurred very rapidly in a matter of  
458 just a few months. Amino acid residue Asp614 is located in subdomain 2 (SD-2)  
459 of the spike protein and forms a hydrogen bond and electrostatic interaction with  
460 two residues in the S2 subunit of a neighboring protomer. Replacement of  
461 aspartate with glycine would eliminate both interactions, thereby substantively  
462 weakening the contact between the S1 and S2 subunits. We previously  
463 speculated (75) that this weakening produces a more fusogenic spike protein, as  
464 S1 must first dissociate from S2 before S2 can refold and mediate fusion of virus  
465 and cell membranes. Stated another way, virus strains with the Gly614 variant  
466 may be better able to enter host cells, potentially resulting in enhanced spread.  
467 Consistent with this idea, Korber et al. (66) showed that the Gly614 variant grows  
468 to higher titer as pseudotyped virions. On initial diagnosis infected individuals had  
469 lower RT-PCR cycle thresholds suggesting higher upper respiratory tract viral  
470 loads. Our data (**Figure 7**) are fully consistent with that finding Zhang et al. (73)

471 reported that pseudovirus with the 614Gly variant infected ACE2-expressing cells  
472 more efficiently than the 614Asp. Similar results have been described by Hu et  
473 al. (67) and Lorenzo-Redondo et al. (68). Plante et al. (76) recently studied  
474 isogenic mutant SARS-CoV-2 strains with either the 614Asp or 614Gly variant  
475 and found that the 614Gly variant virus had significantly increased replication in  
476 human lung epithelial cells *in vitro* and increased infectious titers in nasal and  
477 trachea washes obtained from experimentally infected hamsters. These results  
478 are consistent with the idea that the 614Gly variant bestows increased virus  
479 fitness in the upper respiratory tract (76).

480 Additional work is needed to investigate the potential biomedical relevance  
481 and public health importance of the Asp614Gly polymorphism, including but not  
482 limited to virus dissemination, overall fitness, impact on clinical course and  
483 virulence, and development of vaccines and therapeutics. Although it is possible  
484 that stochastic processes alone may account for the rapid increase in COVID-19  
485 disease frequency caused by viruses containing the Gly614 variant, we do not  
486 favor that interpretation in part because of the cumulative weight of the  
487 epidemiologic, human RT-PCR diagnostics data, *in vitro* experimental findings,  
488 and animal infection studies using isogenic mutant virus strains. In addition, if  
489 stochastic processes solely are responsible, we believe it is difficult to explain  
490 essentially simultaneous increase in frequency of the Gly614 variant in  
491 genetically diverse viruses in three distinct clades (G, GH, and GR) in a  
492 geographically large metropolitan area with 7 million ethnically diverse people.  
493 Regardless, more research on this important topic is warranted.

494           Several groups have analyzed the relationship between human genetics,  
495 blood types, and patient outcomes (33, 34, 77-80). In this regard, we identified a  
496 correlation between Rh factor-positive blood type and increased mortality and  
497 length of ICU stay. (Supplemental Table 3). Thus, our data are consistent with  
498 studies suggesting that there are host genetic factors that contribute to disease  
499 severity and outcome. More research is required to address the important  
500 possibility.

501           The diversity present in our 1,026 virus genomes from the first disease  
502 wave contrasts somewhat with data reported by Gonzalez-Reiche et al., who  
503 studied 84 SARS-CoV-2 isolates causing disease in patients in the New York  
504 City region (11). Those investigators concluded that the vast majority of disease  
505 was caused by progeny of strains imported from Europe. Similarly, Bedford et al.  
506 (10) reported that much of the COVID-19 disease in the Seattle, Washington  
507 area was caused by strains that are progeny of a virus strain recently introduced  
508 from China. Some aspects of our findings are similar to those reported recently  
509 by Lemieux et al. based on analysis of strains causing disease in the Boston  
510 area (81). Our findings, like theirs, highlight the importance of multiple  
511 importation events of genetically diverse strains in the epidemiology of COVID-19  
512 disease in this pandemic. Similarly, Icelandic and Brazilian investigators  
513 documented that SARS-CoV-2 was imported by individuals traveling to or from  
514 many European and other countries (82, 83).

515           The virus genome diversity and large sample size in our study permitted  
516 us to test the hypothesis that distinct virus clades were nonrandomly associated

517 with hospitalized COVID-19 patients or disease severity. We did not find  
518 evidence to support this hypothesis, but our continuing study of COVID-19 cases  
519 accruing in the second wave will further improve statistical stratification.

520 We used machine learning classifiers to identify if any SNPs contribute to  
521 increased infection severity or otherwise affect virus-host outcome. The models  
522 could not be trained to accurately predict these outcomes from the available virus  
523 genome sequence data. This may be due to sample size or class imbalance.  
524 However, we do not favor this interpretation. Rather, we think that the inability to  
525 identify particular virus SNPs predictive of disease severity or infection outcome  
526 likely reflects the substantial heterogeneity in underlying medical conditions and  
527 treatment regimens among COVID-19 patients studied herein. An alternative but  
528 not mutually exclusive hypothesis is that patient genotypes play an important role  
529 in determining virus-human interactions and resulting pathology. Although some  
530 evidence has been presented in support of this idea (84, 85), available data  
531 suggest that in the aggregate, host genetics does not play an overwhelming role  
532 in determining outcome in the great majority of adult patients, once virus infection  
533 is established.

534 Remdesivir is a nucleoside analog reported to have activity against  
535 MERS-CoV, a coronavirus related to SARS-CoV-2. Recently, several studies  
536 have reported that remdesivir shows promise in treating COVID-19 patients (29-  
537 33), leading the FDA to issue an emergency use authorization. Because *in vitro*  
538 resistance of SARS-CoV to remdesivir has been reported to be caused by either  
539 of two amino acid replacements in RdRp (Phe479Leu or Val556Leu), we



540 interrogated our data for polymorphisms in the *nsp12* gene. Although we  
541 identified 140 different inferred amino acid replacements in RdRp in the 5,085  
542 genomes analyzed, none of these were located precisely at the two positions  
543 associated with *in vitro* resistance to remdesivir. Inasmuch as remdesivir is now  
544 being deployed widely to treat COVID-19 patients in Houston and elsewhere, our  
545 findings suggest that the majority of SARS-CoV-2 strains currently circulating in  
546 our region should be susceptible to this drug.

547         The amino acid replacements Ala442Val, Ala448Val, Ala553Pro/Val, and  
548 Gly682Arg that we identified occur at sites that, intriguingly, are located directly  
549 above the nucleotide substrate entry channel and nucleotide binding residues  
550 Lys544, Arg552, and Arg554 (22, 23) (**Figure 4**). One possibility is that  
551 substitution of the smaller alanine or glycine residues with the bulkier side chains  
552 of Val/Pro/Arg may impose structural constraints for the modified nucleotide  
553 analog to bind, and thereby disfavor remdesivir binding. This, in turn, may lead to  
554 reduced incorporation of remdesivir into the nascent RNA, increased fidelity of  
555 RNA synthesis, and ultimately drug resistance. A similar mechanism has been  
556 proposed for a Val556Leu change (23).

557         We also identified one strain with a Lys477Asn replacement in RdRp. This  
558 substitution is located close to a Phe479Leu replacement reported to produce  
559 partial resistance to remdesivir *in vitro* in SARS-CoV patients from 2004,  
560 although the amino acid positions are numbered differently in SARS-CoV and  
561 SARS-CoV-2. Structural studies have suggested that this amino acid is surface-  
562 exposed, and distant from known key functional elements. Our observed

563 Lys477Asn change is also located in a conserved motif described as a finger  
564 domain of RdRp (**Figure 3 and 4**). One speculative possibility is that Lys477 is  
565 involved in binding a yet unidentified cofactor such as Nsp7 or Nsp8, an  
566 interaction that could modify nucleotide binding and/or fidelity at a distance.  
567 These data warrant additional study in larger patient cohorts, especially in  
568 individuals treated with remdesivir.

569 Analysis of the gene encoding the spike protein identified 285 polymorphic  
570 amino acid sites relative to the reference genome, including 49 inferred amino  
571 acid replacements not present in available databases as of August 19, 2020.  
572 Importantly, 30 amino acid sites in the spike protein had two or three distinct  
573 replacements relative to the reference strain. The occurrence of multiple variants  
574 at the same amino acid site is one characteristic that may suggest functional  
575 consequences. These data, coupled with structural information available for  
576 spike protein, raise the possibility that some of the amino acid variants have  
577 functional consequences, for example including altered serologic reactivity and  
578 shown here. These data permit generation of many biomedically relevant  
579 hypotheses now under study.

580 A recent study reported that RBD amino acid changes could be selected  
581 *in vitro* using a pseudovirus neutralization assay and sera obtained from  
582 convalescent plasma or monoclonal antibodies (86). The amino acid sites  
583 included positions V445 and E484 in the RBD. Important to note, variants G446V  
584 and E484Q were present in our patient samples. However, these mutations  
585 retain high affinity to CR3022 (**Figure 8F, G**). The high-resolution structure of the

586 RBD/CR3022 complex shows that CR3022 makes contacts to residues 369-386,  
587 380-392, and 427-430 of RBD (74). Although there is no overlap between  
588 CR3022 and ACE2 epitopes, CR3022 is able to neutralize the virus through an  
589 allosteric effect. We found that the Ser373Pro change, which is located within the  
590 CR3022 epitope, has reduced affinity to CR3022 (**Figure 8F, G**). The F338L and  
591 R408T mutations, although not found directly within the interacting epitope, also  
592 display reduced binding to CR3022. Other investigators (86) using *in vitro*  
593 antibody selection identified a change at amino acid site S151 in the N-terminal  
594 domain, and we found mutations S151N and S151I in our patient samples. We  
595 also note that two variant amino acids (Gly446Val and Phe456Leu) we identified  
596 are located in a linear epitope found to be critical for a neutralizing monoclonal  
597 antibody described recently by Li et al. (87).

598         In the aggregate, these findings suggest that mutations emerging within  
599 the spike protein at positions within and proximal to known neutralization  
600 epitopes may result in escape from antibodies and other therapeutics currently  
601 under development. Importantly, our study did not reveal that these mutant  
602 strains had disproportionately increased over time. The findings may also bear  
603 on the occurrence of multiple amino acid substitutions at the same amino acid  
604 site that we identified in this study, commonly a signal of selection. In the  
605 aggregate, the data support a multifaceted approach to serological monitoring  
606 and biologics development, including the use of monoclonal antibody cocktails  
607 (46, 47, 88).

608

## 609 **CONCLUDING STATEMENT**

610 Our work represents analysis of the largest sample to date of SARS-CoV-2  
611 genome sequences from patients in one metropolitan region in the United States.  
612 The investigation was facilitated by the fact that we had rapidly assessed a  
613 SARS-CoV-2 molecular diagnostic test in January 2020, more than a month  
614 before the first COVID-19 patient was diagnosed in Houston. In addition, our  
615 large healthcare system has seven hospitals and many facilities (e.g., outpatient  
616 care centers, emergency departments) located in geographically diverse areas of  
617 the city. We also provide reference laboratory services for other healthcare  
618 entities in the Houston area. Together, our facilities serve patients of diverse  
619 ethnicities and socioeconomic status. Thus, the data presented here likely reflect  
620 a broad overview of virus diversity causing COVID-19 infections throughout  
621 metropolitan Houston. We previously exploited these features to study influenza  
622 and *Klebsiella pneumoniae* dissemination in metropolitan Houston (89, 90). We  
623 acknowledge that every “twig” of the SARS-CoV-2 evolutionary tree in Houston is  
624 not represented in these data. The samples studied are not comprehensive for  
625 the entire metropolitan region. For example, it is possible that our strain samples  
626 are not fully representative of individuals who are indigent, homeless, or of very  
627 low socioeconomic groups. In addition, although the strain sample size is  
628 relatively large compared to other studies, the sample represents only about 10%  
629 of all COVID-19 cases in metropolitan Houston documented in the study period.  
630 In addition, some patient samples contain relatively small amounts of virus  
631 nucleic acid and do not yield adequate sequence data for high-quality genome

632 analysis. Thus, our data likely underestimate the extent of genome diversity  
633 present among SARS-CoV-2 causing COVID-19 and will not identify all amino  
634 acid replacements in the virus in this geographic region. It will be important to  
635 sequence and analyze the genomes of additional SARS-CoV-2 strains causing  
636 COVID-19 cases in the ongoing second massive disease wave in metropolitan  
637 Houston, and these studies are underway. Data of this type will be especially  
638 important to have if a third and subsequent waves were to occur in metropolitan  
639 Houston, as it could provide insight into molecular and epidemiologic events  
640 contributing to them.

641 The genomes reported here are an important data resource that will  
642 underpin our ongoing study of SARS-CoV-2 molecular evolution, dissemination,  
643 and medical features of COVID-19 in Houston. As of August 19, 2020, there  
644 were 135,866 reported cases of COVID-19 in metropolitan Houston, and the  
645 number of cases is increasing daily. Although the full array of factors contributing  
646 to the massive second wave in Houston is not known, it is possible that the  
647 potential for increased transmissibility of SARS-CoV-2 with the Gly614 may have  
648 played a role, as well as changes in behavior associated with the Memorial Day  
649 and July 4<sup>th</sup> holidays, and relaxation of some of the social constraints imposed  
650 during the first wave. The availability of extensive virus genome data dating from  
651 the earliest reported cases of COVID-19 in metropolitan Houston, coupled with  
652 the database we have now constructed, may provide critical insights into the  
653 origin of new infection spikes and waves occurring as public health constraints  
654 are further relaxed, schools and colleges re-open, holidays occur, commercial air

655 travel increases, and individuals change their behavior because of COVID-19  
656 “fatigue.” The genome data will also be useful in assessing ongoing molecular  
657 evolution in spike and other proteins as baseline herd immunity is generated,  
658 either by natural exposure to SARS-CoV-2 or by vaccination. The signal of  
659 potential selection contributing to some spike protein diversity and identification  
660 of naturally occurring mutant RBD variants with altered serologic recognition  
661 warrant close attention and expanded study.

662

## 663 **MATERIALS AND METHODS**

664 **Patient specimens.** All specimens were obtained from individuals who  
665 were registered patients at Houston Methodist hospitals, associated facilities  
666 (e.g., urgent care centers), or institutions in the greater Houston metropolitan  
667 region that use our laboratory services. Virtually all individuals met the criteria  
668 specified by the Centers for Disease Control and Prevention to be classified as a  
669 person under investigation.

670

671 **SARS-CoV-2 molecular diagnostic testing.** Specimens obtained from  
672 symptomatic patients with a high degree of suspicion for COVID-19 disease were  
673 tested in the Molecular Diagnostics Laboratory at Houston Methodist Hospital  
674 using an assay granted Emergency Use Authorization (EUA) from the FDA  
675 ([https://www.fda.gov/medical-devices/emergency-situations-medical-](https://www.fda.gov/medical-devices/emergency-situations-medical-devices/faqs-diagnostic-testing-sars-cov-2#offeringtests)  
676 [devices/faqs-diagnostic-testing-sars-cov-2#offeringtests](https://www.fda.gov/medical-devices/emergency-situations-medical-devices/faqs-diagnostic-testing-sars-cov-2#offeringtests)). Multiple testing  
677 platforms were used, including an assay that follows the protocol published by

678 the WHO ([https://www.who.int/docs/default-source/coronaviruse/protocol-v2-](https://www.who.int/docs/default-source/coronaviruse/protocol-v2-1.pdf)  
679 [1.pdf](https://www.who.int/docs/default-source/coronaviruse/protocol-v2-1.pdf)) using the EZ1 virus extraction kit and EZ1 Advanced XL instrument or  
680 QIASymphony DSP Virus kit and QIASymphony instrument for nucleic acid  
681 extraction and ABI 7500 Fast Dx instrument with 7500 SDS software for reverse  
682 transcription RT-PCR, the COVID-19 test using BioFire Film Array 2.0  
683 instruments, the Xpert Xpress SARS-CoV-2 test using Cepheid GeneXpert  
684 Infinity or Cepheid GeneXpert Xpress IV instruments, the SARS-CoV-2 Assay  
685 using the Hologic Panther instrument, and the Aptima SARS-CoV-2 Assay using  
686 the Hologic Panther Fusion system. All assays were performed according to the  
687 manufacturer's instructions. Testing was performed on material obtained from  
688 nasopharyngeal or oropharyngeal swabs immersed in universal transport media  
689 (UTM), bronchoalveolar lavage fluid, or sputum treated with dithiothreitol (DTT).  
690 To standardize specimen collection, an instructional video was created for  
691 Houston Methodist healthcare workers  
692 (<https://vimeo.com/396996468/2228335d56>).

693

694 **Epidemiologic curve.** The number of confirmed COVID-19 positive cases  
695 was obtained from USAFacts.org ([https://usafacts.org/visualizations/coronavirus-](https://usafacts.org/visualizations/coronavirus-covid-19-spread-map/)  
696 [covid-19-spread-map/](https://usafacts.org/visualizations/coronavirus-covid-19-spread-map/)) for Austin, Brazoria, Chambers, Fort Bend, Galveston,  
697 Harris, Liberty, Montgomery, and Waller counties. Positive cases for Houston  
698 Methodist Hospital patients were obtained from our Laboratory Information  
699 System and plotted using the documented collection time.

700

701           **SARS-CoV-2 genome sequencing.** Libraries for whole virus genome  
702 sequencing were prepared according to version 1 or version 3 of the ARTIC  
703 nCoV-2019 sequencing protocol (<https://artic.network/ncov-2019>). Long reads  
704 were generated with the LSK-109 sequencing kit, 24 native barcodes (NBD104  
705 and NBD114 kits), and a GridION instrument (Oxford Nanopore). Short reads  
706 were generated with the NexteraXT kit and NextSeq 550 instrument (Illumina).

707

708           **SARS-CoV-2 genome sequence analysis.** Consensus virus genome  
709 sequences from the Houston area isolates were generated using the ARTIC  
710 nCoV-2019 bioinformatics pipeline. Publicly available genomes and metadata  
711 were acquired through GISAID on August 19, 2020. GISAID sequences  
712 containing greater than 1% N characters, and Houston sequences with greater  
713 than 5% N characters were removed from consideration. Identical GISAID  
714 sequences originating from the same geographic location with the same  
715 collection date were also removed from consideration to reduce redundancy.  
716 Nucleotide sequence alignments for the combined Houston and GISAID strains  
717 were generated using MAFFT version 7.130b with default parameters (91).  
718 Sequences were manually curated in JalView (92) to trim the ends and to  
719 remove sequences containing spurious inserts. Phylogenetic trees were  
720 generated using FastTree with the generalized time-reversible model for  
721 nucleotide sequences (93). CLC Genomics Workbench (QIAGEN) was used to  
722 generate the phylogenetic tree figures.

723



724           **Geospatial mapping.** The home address zip code for all SARS-CoV-2  
725 positive patients was used to generate the geospatial maps. To examine  
726 geographic relatedness among genetically similar isolates, geospatial maps were  
727 filtered to isolates containing specific amino acid changes.

728

729           **Time series.** Geospatial data were filtered into wave 1 (3/5/2020-  
730 5/11/2020) and wave 2 (5/12/2020-7/7/2020) time intervals to illustrate the  
731 spread of confirmed SARS-CoV-2 positive patients identified over time.

732

733           **Machine learning.** Virus genome alignments and patient metadata were  
734 used to build models to predict patient metadata and outcomes using both  
735 classification models and regression. Metadata considered for prediction in the  
736 classification models included age, ABO and Rh blood type, ethnic group,  
737 ethnicity, sex, ICU admission, IMU admission, supplemental oxygen use, and  
738 ventilator use. Metadata considered for prediction in regression analysis included  
739 ICU length of stay, IMU length of stay, total length of stay, supplemental oxygen  
740 use, and ventilator use. Because sex, blood type, Rh factor, age, age decade,  
741 ethnicity, and ethnic group are features in the patient features and combined  
742 feature sets, models were not trained for these labels using patient and  
743 combined feature sets. Additionally, age, length of stay, IMU length of stay, ICU  
744 length of stay, mechanical ventilation days, and supplemental oxygen days were  
745 treated as regression problems and XGBoost regressors were built while the rest  
746 were treated as classification problems and XGBoost classifiers were built.

747 Three types of features were considered for training the XGBoost  
748 classifiers: alignment features, patient features, and the combination of alignment  
749 and patient features. Alignment features were generated from the consensus  
750 genome alignment such that columns containing ambiguous nucleotide bases  
751 were removed to ensure the models did not learn patterns from areas of low  
752 coverage. These alignments were then one-hot encoded to form the alignment  
753 features. Patient metadata values were one-hot encoded with the exception of  
754 age, which remained as a raw integer value, to create the patient features.  
755 These metadata values consisted of age, ABO, Rh blood type, ethnic group,  
756 ethnicity, and sex. All three types of feature sets were used to train models that  
757 predict ICU length of stay, IMU length of stay, overall length of stay, days of  
758 supplemental oxygen therapy, and days of ventilator usage while only alignment  
759 features were used to train models that predict age, ABO, Rh blood type, ethnic  
760 group, ethnicity, and sex.

761 A ten-fold cross validation was used to train XGBoost models (94) as  
762 described previously (95, 96). Depths of 4, 8, 16, 32, and 64 were used to tune  
763 the models, but accuracies plateaued after a depth of 16. SciKit-Learn's (97)  
764 classification report and r2 score were then used to assess overall accuracy of  
765 the classification and regression models, respectively.

766

767 **Patient metadata correlations.** We encoded values into multiple columns  
768 for each metadata field. For example, the ABO column was divided into four  
769 columns for A, B, AB, and O blood type. Those columns were encoded with a 1

770 for the patients' ABO type, with all other columns encoded with 0. This was  
771 repeated for all non-outcome metadata fields. Age, however, was not re-  
772 encoded, as the raw integer values were used. Each column was then correlated  
773 to the various outcome values for each patient (deceased, ICU length, IMU  
774 length, length of stay, supplemental oxygen length, and ventilator length) to  
775 obtain a Pearson coefficient correlation value for each metadata label and  
776 outcome.

777

778 **Analysis of the *nsp12* polymerase and S protein genes.** The *nsp12*  
779 virus polymerase and S protein genes were analyzed by plotting SNP density in  
780 the consensus alignment using Python (Python v3.4.3, Biopython Package  
781 v1.72). The frequency of SNPs in the Houston isolates was assessed, along with  
782 amino acid changes for nonsynonymous SNPs.

783

784 **Cycle threshold (Ct) comparison of SARS-CoV-2 strains with either**  
785 **Asp614 or Gly614 amino acid replacements in the spike protein.** The cycle  
786 threshold (Ct) for every sequenced strain that was detected from a patient  
787 specimen using the SARS-CoV-2 Assay on the Hologic Panther instrument was  
788 retrieved from the Houston Methodist Hospital Laboratory Information System.  
789 Statistical significance between the mean Ct value for strains with an aspartate  
790 ( $n=102$ ) or glycine ( $n=812$ ) amino acid at position 614 of the spike protein was  
791 determined with the Mann-Whitney test (GraphPad PRISM 8).

792

793           **Creation and characterization of spike protein RBD variants.** Spike  
794 RBD variants were cloned into the spike-6P (HexaPro; F817P, A892P, A899P,  
795 A942P, K986P, V987P) base construct that also includes the D614G substitution  
796 (pIF638). Briefly, a segment of the gene encoding the RBD was excised with  
797 EcoRI and NheI, mutagenized by PCR, and assembled with a HiFi DNA  
798 Assembly Cloning Kit (NEB).

799           FreeStyle 293-F cells (Thermo Fisher Scientific) were cultured and  
800 maintained in a humidified atmosphere of 37°C and 8% CO<sub>2</sub> while shaking at  
801 110-125rpm. Cells were transfected with plasmids encoding spike protein  
802 variants using polyethylenimine. Three hours post-transfection, 5µM kifunensine  
803 was added to each culture. Cells were harvested four days after transfection and  
804 the protein containing supernatant was separated from the cells by two  
805 centrifugation steps: 10 min at 500rcf and 20 min at 10,000rcf. Supernatants  
806 were kept at 4°C throughout. Clarified supernatant was loaded on a Poly-Prep  
807 chromatography column (Bio-Rad) containing Strep-Tactin Superflow resin (IBA),  
808 washed with five column volumes (CV) of wash buffer (100mM Tris-HCl pH 8.0,  
809 150mM NaCl; 1mM EDTA), and eluted with four CV of elution buffer (100mM  
810 Tris-HCl pH 8.0, 150mM NaCl, 1mM EDTA, 2.5mM d-Desthiobiotin). The eluate  
811 was spin-concentrated (Amicon Ultra-15) to 600µL and further purified via size-  
812 exclusion chromatography (SEC) using a Superose 6 Increase 10/300 column  
813 (G.E.) in SEC buffer (2mM Tris pH 8.0, 200mM NaCl and 0.02% NaN<sub>3</sub>). Proteins  
814 were concentrated to 300µL and stored in SEC buffer.

815 The RBD spike mutants chosen for analysis were all RBD amino acid  
816 mutants identified by our genome sequencing study as of June 15, 2020. We  
817 note that the exact boundaries of the RBD domain varies depending on the paper  
818 used as reference. We used the boundaries demarcated in Figure 1A of Cai et al.  
819 Science paper 21 July) (98) that have K528R located at the RBD-CTD1 interface.

820

821 **Differential scanning fluorimetry.** Recombinant spike proteins were  
822 diluted to a final concentration of 0.05mg/mL with 5X SYPRO orange (Sigma) in  
823 a 96-well qPCR plate. Continuous fluorescence measurements ( $\lambda_{ex}=465\text{nm}$ ,  
824  $\lambda_{em}=580\text{nm}$ ) were collected with a Roche LightCycler 480 II. The temperature  
825 was increased from 22°C to 95°C at a rate of 4.4°C/min. We report the first  
826 melting transition.

827

828 **Enzyme-linked immunosorbent assays.** ELISAs were performed to  
829 characterize binding of S6P, S6P D614G, and S6P D614G-RBD variants to  
830 human ACE2 and the RBD-binding monoclonal antibody CR3022. The ACE2-  
831 hFc chimera was obtained from GenScript (Z03484), and the CR3022 antibody  
832 was purchased from Abcam (Ab273073). Corning 96-well high-binding plates  
833 (CLS9018BC) were coated with spike variants at 2 $\mu\text{g/mL}$  overnight at 4°C. After  
834 washing four times with phosphate buffered saline + 0.1% Tween20 (PBST;  
835 300 $\mu\text{L}$ /well), plates were blocked with PBS+2% milk (PBSM) for 2 h at room  
836 temperature and again washed four times with PBST. These were serially diluted  
837 in PBSM 1:3 seven times in triplicate. After 1 h incubation at room temperature,

838 plates were washed four times in PBST, labeled with 50 $\mu$ L mouse anti-human  
839 IgG1 Fc-HRP (SouthernBlots, 9054-05) for 45 min in PBSM, and washed again  
840 in PBST before addition of 50 $\mu$ L 1-step Ultra TMB-ELISA substrate (Thermo  
841 Scientific, 34028). Reactions were developed for 15 min and stopped by addition  
842 of 50 $\mu$ L 4M H<sub>2</sub>SO<sub>4</sub>. Absorbance intensity (450nm) was normalized within a plate  
843 and EC<sub>50</sub> values were calculated through 4-parameter logistic curve (4PL)  
844 analysis using GraphPad PRISM 8.4.3.

845

#### 846 **ACKNOWLEDGMENTS**

847 We thank Dr. Steven Hinrichs and colleagues at the Nebraska Public Health  
848 Laboratory, and Dr. David Persse and colleagues at the Houston Health  
849 Department for providing samples used to validate our initial SARS-CoV-2  
850 molecular assay. We thank Drs. Jessica Thomas and Zejuan Li, Erika Walker,  
851 Concepcion C. Cantu, the very talented and dedicated molecular technologists,  
852 and the many labor pool volunteers in the Molecular Diagnostics Laboratory for  
853 their dedication to patient care. We also thank Brandi Robinson, Harrold Cano,  
854 Cory Romero, Brooke Burns, and Hayder Mahmood for technical assistance. We  
855 are indebted to Drs. Marc Boom and Dirk Sostman for their support, and to many  
856 very generous Houston philanthropists for their tremendous support of this  
857 ongoing project, including but not limited to anonymous, Ann and John Bookout  
858 III, Carolyn and John Bookout, Ting Tsung and Wei Fong Chao Foundation, Ann  
859 and Leslie Doggett, Freeport LNG, the Hearst Foundations, Jerold B. Katz  
860 Foundation, C. James and Carole Walter Looke, Diane and David Modesett, the

861 Sherman Foundation, and Paula and Joseph C. “Rusty” Walter III. We gratefully  
862 acknowledge the originating and submitting laboratories of the SARS-CoV-2  
863 genome sequences from GISAID’s EpiFlu™ Database used in some of the work  
864 presented here. We also thank many colleagues for critical reading of the  
865 manuscript and suggesting improvements, and Sasha Pejerrey, Adrienne  
866 Winston, Heather McConnell, and Kathryn Stockbauer for editorial contributions.  
867 We are especially indebted to Drs. Nancy Jenkins and Neal Copeland for their  
868 scholarly suggestions to improve an early version of the manuscript.

869

870 **Author contributions:** J.M.M. conceptualized and designed the project; S.W.L,  
871 R.J.O., P.A.C., D.W.B., J.J.D., M.S., M.N., M.O.S., C.C.C., P.Y., L.P., S.S., H.-C.  
872 K., H.H., G.E., H.A.T.N., J.H.L., M.K., J.G., D.B., J.G., J.S.M., C.-W.C., K.J., and  
873 I.F. performed research. All authors contributed to writing the manuscript.

874 Data and material availability: The spike-6P (“HexaPro”) plasmid is available from  
875 Addgene (ID: 154754) or from I.J.F. under a material transfer agreement with  
876 The University of Texas at Austin. Additional plasmids are available upon request  
877 from I.J.F.

878

879 This study was supported by the Fondren Foundation, Houston Methodist  
880 Hospital and Research Institute (to J.M.M.), NIH grant AI127521 (to J.S.M.), NIH  
881 grants GM120554 and GM124141 to I.J.F., the Welch Foundation (F-1808 to  
882 I.J.F.), and the National Science Foundation (1453358 to I.J.F.). I.J.F. is a CPRIT  
883 Scholar in Cancer Research. J.J.D., M.S., and M.N. are supported by the NIAID

- 884 Bacterial and Viral Bioinformatics resource center award (contract number  
885 75N93019C00076). J.J.D. and M.N. are also funded by the United States  
886 Defense Advanced Research Projects Agency Award iSENTRY Friend or Foe  
887 program award (contract number HR0011937807).



## 888 REFERENCES

- 889 1. 2020. World Health Organization Coronavirus Disease 2019 (COVID-19) Situation Report.  
890 [https://www.who.int/docs/default-source/coronaviruse/situation-reports/20200420-sitrep-91-](https://www.who.int/docs/default-source/coronaviruse/situation-reports/20200420-sitrep-91-covid-19.pdf?sfvrsn=fcf0670b_4)  
891 [covid-19.pdf?sfvrsn=fcf0670b\\_4](https://www.who.int/docs/default-source/coronaviruse/situation-reports/20200420-sitrep-91-covid-19.pdf?sfvrsn=fcf0670b_4). Accessed April 21.
- 892 2. Gorbalenya AE, Baker SC, Baric RS, de Groot RJ, Drosten C, Gulyaeva AA, Haagmans BL,  
893 Lauber C, Leontovich AM, Neuman BW, Penzar D, Perlman S, Poon LLM, Samborskiy DV,  
894 Sidorov IA, Sola I, Ziebuhr J, Coronaviridae Study Group of the International Committee on  
895 Taxonomy of V. 2020. The species Severe acute respiratory syndrome-related coronavirus:  
896 classifying 2019-nCoV and naming it SARS-CoV-2. *Nature Microbiology* 5:536-544.
- 897 3. Wang C, Horby PW, Hayden FG, Gao GF. 2020. A novel coronavirus outbreak of global health  
898 concern. *Lancet* 395:470-473.
- 899 4. Perlman S. 2020. Another Decade, Another Coronavirus. *New England Journal of Medicine*  
900 382:760-762.
- 901 5. Allel K, Tapia-Muñoz T, Morris W. 2020. Country-level factors associated with the early spread  
902 of COVID-19 cases at 5, 10 and 15 days since the onset. *Glob Public Health*  
903 doi:10.1080/17441692.2020.1814835:1-14.
- 904 6. Huang C, Wang Y, Li X, Ren L, Zhao J, Hu Y, Zhang L, Fan G, Xu J, Gu X, Cheng Z, Yu T, Xia  
905 J, Wei Y, Wu W, Xie X, Yin W, Li H, Liu M, Xiao Y, Gao H, Guo L, Xie J, Wang G, Jiang R,  
906 Gao Z, Jin Q, Wang J, Cao B. 2020. Clinical features of patients infected with 2019 novel  
907 coronavirus in Wuhan, China. *Lancet* 395:497-506.
- 908 7. Zhu N, Zhang D, Wang W, Li X, Yang B, Song J, Zhao X, Huang B, Shi W, Lu R, Niu P, Zhan F,  
909 Ma X, Wang D, Xu W, Wu G, Gao GF, Tan W. 2020. A Novel Coronavirus from Patients with  
910 Pneumonia in China, 2019. *New England Journal of Medicine* 382:727-733.
- 911 8. Chan JF, Yuan S, Kok KH, To KK, Chu H, Yang J, Xing F, Liu J, Yip CC, Poon RW, Tsoi HW,  
912 Lo SK, Chan KH, Poon VK, Chan WM, Ip JD, Cai JP, Cheng VC, Chen H, Hui CK, Yuen KY.  
913 2020. A familial cluster of pneumonia associated with the 2019 novel coronavirus indicating  
914 person-to-person transmission: a study of a family cluster. *Lancet* 395:514-523.
- 915 9. Wu F, Zhao S, Yu B, Chen YM, Wang W, Song ZG, Hu Y, Tao ZW, Tian JH, Pei YY, Yuan ML,  
916 Zhang YL, Dai FH, Liu Y, Wang QM, Zheng JJ, Xu L, Holmes EC, Zhang YZ. 2020. A new  
917 coronavirus associated with human respiratory disease in China. *Nature* 579:265-269.
- 918 10. Bedford T, Greninger AL, Roychoudhury P, Starita LM, Famulare M, Huang M-L, Nalla A,  
919 Pepper G, Reinhardt A, Xie H, Shrestha L, Nguyen TN, Adler A, Brandstetter E, Cho S, Giroux  
920 D, Han PD, Fay K, Frazar CD, Ilcisin M, Lacombe K, Lee J, Kiavand A, Richardson M, Sibley  
921 TR, Truong M, Wolf CR, Nickerson DA, Rieder MJ, Englund JA, Hadfield J, Hodcroft EB,  
922 Huddleston J, Moncla LH, Müller NF, Neher RA, Deng X, Gu W, Federman S, Chiu C, Duchin J,  
923 Gautom R, Melly G, Hiatt B, Dykema P, Lindquist S, Queen K, Tao Y, Uehara A, Tong S, et al.  
924 2020. Cryptic transmission of SARS-CoV-2 in Washington State. *medRxiv*  
925 doi:10.1101/2020.04.02.20051417:2020.04.02.20051417.
- 926 11. Gonzalez-Reiche AS, Hernandez MM, Sullivan MJ, Ciferri B, Alshammary H, Obla A, Fabre S,  
927 Kleiner G, Polanco J, Khan Z, Albuquerque B, van de Guchte A, Dutta J, Francoeur N, Melo BS,  
928 Oussenko I, Deikus G, Soto J, Sridhar SH, Wang Y-C, Twyman K, Kasarskis A, Altman DR,  
929 Smith M, Sebra R, Aberg J, Krammer F, García-Sastre A, Luksza M, Patel G, Paniz-Mondolfi A,  
930 Gitman M, Sordillo EM, Simon V, van Bakel H. 2020. Introductions and early spread of SARS-  
931 CoV-2 in the New York City area. *Science* 369:297-301.
- 932 12. Health N. 2020. COVID-19 Data. <https://www1.nyc.gov/site/doh/covid/covid-19-data.page>.  
933 Accessed August 19.
- 934 13. County K. 2020. Daily COVID-19 outbreak summary.  
935 <https://www.kingcounty.gov/depts/health/covid-19/data/daily-summary.aspx>. Accessed August  
936 18.
- 937 14. Cline M, Emerson M, bratter j, howell j, Jeanty P. 2012. Houston Region Grows More  
938 Racially/Ethnically Diverse, With Small Declines in Segregation. A Joint Report Analyzing Census  
939 Data from 1990, 2000, and 2010.
- 940 15. Emerson M, Bratter J, Howell J, Jeanty P, Cline M. 2012. Houston Region Grows More  
941 Racially/Ethnically Diverse, With Small Declines in Segregation. A Joint Report Analyzing

- 942 Census Data from 1990, 2000, and 2010. Kinder Institute for Urban Research & the Hobby  
943 Center for the Study of Texas,  
944 16. Services THaH. 2020. Texas Health and Human Services. <https://hhs.texas.gov/>. Accessed  
945 August 18.
- 946 17. Vahidy FS, Drews AL, Masud FN, Schwartz RL, Askary BB, Boom ML, Phillips RA. 2020.  
947 Characteristics and Outcomes of COVID-19 Patients During Initial Peak and Resurgence in the  
948 Houston Metropolitan Area. *Jama* doi:10.1001/jama.2020.15301.
- 949 18. Diehl WE, Lin AE, Grubaugh ND, Carvalho LM, Kim K, Kyawe PP, McCauley SM, Donnard E,  
950 Kucukural A, McDonel P, Schaffner SF, Garber M, Rambaut A, Andersen KG, Sabeti PC, Luban  
951 J. 2016. Ebola Virus Glycoprotein with Increased Infectivity Dominated the 2013-2016 Epidemic.  
952 *Cell* 167:1088-1098.e6.
- 953 19. Urbanowicz RA, McClure CP, Sakuntabhai A, Sall AA, Kobinger G, Müller MA, Holmes EC,  
954 Rey FA, Simon-Loriere E, Ball JK. 2016. Human Adaptation of Ebola Virus during the West  
955 African Outbreak. *Cell* 167:1079-1087.e5.
- 956 20. Dietzel E, Schudt G, Krähling V, Matrosovich M, Becker S. 2017. Functional Characterization of  
957 Adaptive Mutations during the West African Ebola Virus Outbreak. *J Virol* 91.
- 958 21. Kachroo P, Eraso JM, Beres SB, Olsen RJ, Zhu L, Nasser W, Bernard PE, Cantu CC, Saavedra  
959 MO, Arredondo MJ, Strobe B, Do H, Kumaraswami M, Vuopio J, Grondahl-Yli-Hannuksela K,  
960 Kristinsson KG, Gottfredsson M, Pesonen M, Pensar J, Davenport ER, Clark AG, Corander J,  
961 Caugant DA, Gaini S, Magnussen MD, Kubiak SL, Nguyen HAT, Long SW, Porter AR, DeLeo  
962 FR, Musser JM. 2019. Integrated analysis of population genomics, transcriptomics and virulence  
963 provides novel insights into *Streptococcus pyogenes* pathogenesis. *Nat Genet* 51:548-559.
- 964 22. Gao Y, Yan L, Huang Y, Liu F, Zhao Y, Cao L, Wang T, Sun Q, Ming Z, Zhang L, Ge J, Zheng  
965 L, Zhang Y, Wang H, Zhu Y, Zhu C, Hu T, Hua T, Zhang B, Yang X, Li J, Yang H, Liu Z, Xu W,  
966 Guddat LW, Wang Q, Lou Z, Rao Z. 2020. Structure of the RNA-dependent RNA polymerase  
967 from COVID-19 virus. *Science* doi:10.1126/science.abb7498:eabb7498.
- 968 23. Yin W, Mao C, Luan X, Shen D-D, Shen Q, Su H, Wang X, Zhou F, Zhao W, Gao M, Chang S,  
969 Xie Y-C, Tian G, Jiang H-W, Tao S-C, Shen J, Jiang Y, Jiang H, Xu Y, Zhang S, Zhang Y, Xu  
970 HE. 2020. Structural basis for inhibition of the RNA-dependent RNA polymerase from SARS-  
971 CoV-2 by remdesivir. *Science* 368:1499-1504.
- 972 24. Shannon A, Le NT, Selisko B, Eydoux C, Alvarez K, Guillemot JC, Decroly E, Peersen O, Ferron  
973 F, Canard B. 2020. Remdesivir and SARS-CoV-2: Structural requirements at both nsp12 RdRp  
974 and nsp14 Exonuclease active-sites. *Antiviral Res* 178:104793.
- 975 25. Gordon CJ, Tchesnokov EP, Woolner E, Perry JK, Feng JY, Porter DP, Gotte M. 2020.  
976 Remdesivir is a direct-acting antiviral that inhibits RNA-dependent RNA polymerase from severe  
977 acute respiratory syndrome coronavirus 2 with high potency. *J Biol Chem*  
978 doi:10.1074/jbc.RA120.013679.
- 979 26. Agostini ML, Andres EL, Sims AC, Graham RL, Sheahan TP, Lu X, Smith EC, Case JB, Feng  
980 JY, Jordan R, Ray AS, Cihlar T, Siegel D, Mackman RL, Clarke MO, Baric RS, Denison MR.  
981 2018. Coronavirus Susceptibility to the Antiviral Remdesivir (GS-5734) Is Mediated by the Viral  
982 Polymerase and the Proofreading Exoribonuclease. *mBio* 9.
- 983 27. de Wit E, Feldmann F, Cronin J, Jordan R, Okumura A, Thomas T, Scott D, Cihlar T, Feldmann  
984 H. 2020. Prophylactic and therapeutic remdesivir (GS-5734) treatment in the rhesus macaque  
985 model of MERS-CoV infection. *Proc Natl Acad Sci U S A* 117:6771-6776.
- 986 28. Williamson BN, Feldmann F, Schwarz B, Meade-White K, Porter DP, Schulz J, van Doremalen  
987 N, Leighton I, Yinda CK, Pérez-Pérez L, Okumura A, Lovaglio J, Hanley PW, Saturday G, Bosio  
988 CM, Anzick S, Barbian K, Cihlar T, Martens C, Scott DP, Munster VJ, de Wit E. 2020. Clinical  
989 benefit of remdesivir in rhesus macaques infected with SARS-CoV-2. *Nature* 585:273-276.
- 990 29. Grein J, Ohmagari N, Shin D, Diaz G, Asperges E, Castagna A, Feldt T, Green G, Green ML,  
991 Lescure FX, Nicastri E, Oda R, Yo K, Quiros-Roldan E, Studemeister A, Redinski J, Ahmed S,  
992 Bennett J, Chelliah D, Chen D, Chihara S, Cohen SH, Cunningham J, D'Arminio Monforte A,  
993 Ismail S, Kato H, Lapadula G, L'Her E, Maeno T, Majumder S, Massari M, Mora-Rillo M, Mutoh  
994 Y, Nguyen D, Verweij E, Zoufaly A, Osinusi AO, DeZure A, Zhao Y, Zhong L, Chokkalingam A,  
995 Elboudwarej E, Telep L, Timbs L, Henne I, Sellers S, Cao H, Tan SK, Winterbourne L, Desai P,  
996 et al. 2020. Compassionate Use of Remdesivir for Patients with Severe Covid-19. *N Engl J Med*  
997 doi:10.1056/NEJMoa2007016.

- 998 30. Goldman JD, Lye DCB, Hui DS, Marks KM, Bruno R, Montejano R, Spinner CD, Galli M, Ahn  
999 MY, Nahass RG, Chen YS, SenGupta D, Hyland RH, Osinusi AO, Cao H, Blair C, Wei X,  
1000 Gaggar A, Brainard DM, Towner WJ, Muñoz J, Mullane KM, Marty FM, Tashima KT, Diaz G,  
1001 Subramanian A. 2020. Remdesivir for 5 or 10 Days in Patients with Severe Covid-19. *N Engl J*  
1002 *Med* doi:10.1056/NEJMoa2015301.
- 1003 31. Beigel JH, Tomashek KM, Dodd LE, Mehta AK, Zingman BS, Kalil AC, Hohmann E, Chu HY,  
1004 Luetkemeyer A, Kline S, Lopez de Castilla D, Finberg RW, Dierberg K, Tapon V, Hsieh L,  
1005 Patterson TF, Paredes R, Sweeney DA, Short WR, Touloumi G, Lye DC, Ohmagari N, Oh MD,  
1006 Ruiz-Palacios GM, Benfield T, Fätkenheuer G, Kortepeter MG, Atmar RL, Creech CB, Lundgren  
1007 J, Babiker AG, Pett S, Neaton JD, Burgess TH, Bonnett T, Green M, Makowski M, Osinusi A,  
1008 Nayak S, Lane HC. 2020. Remdesivir for the Treatment of Covid-19 - Preliminary Report. *N Engl*  
1009 *J Med* doi:10.1056/NEJMoa2007764.
- 1010 32. Spinner CD, Gottlieb RL, Criner GJ, Arribas López JR, Cattelan AM, Soriano Viladomiu A,  
1011 Ogbuagu O, Malhotra P, Mullane KM, Castagna A, Chai LYA, Roestenberg M, Tsang OTY,  
1012 Bernasconi E, Le Turnier P, Chang SC, SenGupta D, Hyland RH, Osinusi AO, Cao H, Blair C,  
1013 Wang H, Gaggar A, Brainard DM, McPhail MJ, Bhagani S, Ahn MY, Sanyal AJ, Huhn G, Marty  
1014 FM. 2020. Effect of Remdesivir vs Standard Care on Clinical Status at 11 Days in Patients With  
1015 Moderate COVID-19: A Randomized Clinical Trial. *Jama* doi:10.1001/jama.2020.16349.
- 1016 33. Olender SA, Perez KK, Go AS, Balani B, Price-Haywood EG, Shah NS, Wang S, Walunas TL,  
1017 Swaminathan S, Slim J, Chin B, De Wit S, Ali SM, Soriano Viladomiu A, Robinson P, Gottlieb  
1018 RL, Tsang TYO, Lee IH, Haubrich RH, Chokkalingam AP, Lin L, Zhong L, Bekele BN, Mera-  
1019 Giler R, Gallant J, Smith LE, Osinusi AO, Brainard DM, Hu H, Phulpin C, Edgar H, Diaz-Cuervo  
1020 H, Bernardino JI. 2020. Remdesivir for Severe COVID-19 versus a Cohort Receiving Standard of  
1021 Care. *Clin Infect Dis* doi:10.1093/cid/ciaa1041.
- 1022 34. (CNCB) CNCfB. 2020. 2019 Novel Coronavirus Resource (2019nCoV).  
1023 <https://bigd.big.ac.cn/ncov/about?lang=en>. Accessed August 19.
- 1024 35. Wrapp D, Wang N, Corbett KS, Goldsmith JA, Hsieh C-L, Abiona O, Graham BS, McLellan JS.  
1025 2020. Cryo-EM structure of the 2019-nCoV spike in the prefusion conformation. *Science*  
1026 367:1260-1263.
- 1027 36. Walls AC, Park YJ, Tortorici MA, Wall A, McGuire AT, Veesler D. 2020. Structure, Function,  
1028 and Antigenicity of the SARS-CoV-2 Spike Glycoprotein. *Cell* 181:281-292.e6.
- 1029 37. Wang Q, Zhang Y, Wu L, Niu S, Song C, Zhang Z, Lu G, Qiao C, Hu Y, Yuen KY, Wang Q,  
1030 Zhou H, Yan J, Qi J. 2020. Structural and Functional Basis of SARS-CoV-2 Entry by Using  
1031 Human ACE2. *Cell* doi:10.1016/j.cell.2020.03.045.
- 1032 38. Jackson LA, Anderson EJ, Roush NG, Roberts PC, Makhene M, Coler RN, McCullough MP,  
1033 Chappell JD, Denison MR, Stevens LJ, Pruijssers AJ, McDermott A, Flach B, Doria-Rose NA,  
1034 Corbett KS, Morabito KM, O'Dell S, Schmidt SD, Swanson PA, 2nd, Padilla M, Mascola JR,  
1035 Neuzil KM, Bennett H, Sun W, Peters E, Makowski M, Albert J, Cross K, Buchanan W, Pikaart-  
1036 Tautges R, Ledgerwood JE, Graham BS, Beigel JH. 2020. An mRNA Vaccine against SARS-  
1037 CoV-2 - Preliminary Report. *N Engl J Med* doi:10.1056/NEJMoa2022483.
- 1038 39. Folegatti PM, Ewer KJ, Aley PK, Angus B, Becker S, Belij-Rammerstorfer S, Bellamy D, Bibi S,  
1039 Bittaye M, Clutterbuck EA, Dold C, Faust SN, Finn A, Flaxman AL, Hallis B, Heath P, Jenkin D,  
1040 Lazarus R, Makinson R, Minassian AM, Pollock KM, Ramasamy M, Robinson H, Snape M,  
1041 Tarrant R, Voysey M, Green C, Douglas AD, Hill AVS, Lambe T, Gilbert SC, Pollard AJ. 2020.  
1042 Safety and immunogenicity of the ChAdOx1 nCoV-19 vaccine against SARS-CoV-2: a  
1043 preliminary report of a phase 1/2, single-blind, randomised controlled trial. *Lancet* 396:467-478.
- 1044 40. Zhu FC, Guan XH, Li YH, Huang JY, Jiang T, Hou LH, Li JX, Yang BF, Wang L, Wang WJ, Wu  
1045 SP, Wang Z, Wu XH, Xu JJ, Zhang Z, Jia SY, Wang BS, Hu Y, Liu JJ, Zhang J, Qian XA, Li Q,  
1046 Pan HX, Jiang HD, Deng P, Gou JB, Wang XW, Wang XH, Chen W. 2020. Immunogenicity and  
1047 safety of a recombinant adenovirus type-5-vectored COVID-19 vaccine in healthy adults aged 18  
1048 years or older: a randomised, double-blind, placebo-controlled, phase 2 trial. *Lancet* 396:479-488.
- 1049 41. Brouwer PJM, Caniels TG, van der Straten K, Snitselaar JL, Aldon Y, Bangaru S, Torres JL, Okba  
1050 NMA, Claireaux M, Kerster G, Bentlage AEH, van Haaren MM, Guerra D, Burger JA, Schermer  
1051 EE, Verheul KD, van der Velde N, van der Kooi A, van Schooten J, van Breemen MJ, Bijl TPL,  
1052 Slieden K, Aartse A, Derking R, Bontjer I, Kootstra NA, Wiersinga WJ, Vidarsson G, Haagmans

- 1053 BL, Ward AB, de Bree GJ, Sanders RW, van Gils MJ. 2020. Potent neutralizing antibodies from  
1054 COVID-19 patients define multiple targets of vulnerability. *Science* 369:643-650.
- 1055 42. Chi X, Yan R, Zhang J, Zhang G, Zhang Y, Hao M, Zhang Z, Fan P, Dong Y, Yang Y, Chen Z,  
1056 Guo Y, Zhang J, Li Y, Song X, Chen Y, Xia L, Fu L, Hou L, Xu J, Yu C, Li J, Zhou Q, Chen W.  
1057 2020. A neutralizing human antibody binds to the N-terminal domain of the Spike protein of  
1058 SARS-CoV-2. *Science* 369:650-655.
- 1059 43. Wec AZ, Wrapp D, Herbert AS, Maurer DP, Haslwanter D, Sakharkar M, Jangra RK, Dieterle  
1060 ME, Lilov A, Huang D, Tse LV, Johnson NV, Hsieh C-L, Wang N, Nett JH, Champney E,  
1061 Burnina I, Brown M, Lin S, Sinclair M, Johnson C, Pudi S, Bortz R, Wirchnianski AS,  
1062 Laudermilch E, Florez C, Fels JM, O'Brien CM, Graham BS, Nemazee D, Burton DR, Baric RS,  
1063 Voss JE, Chandran K, Dye JM, McLellan JS, Walker LM. 2020. Broad neutralization of SARS-  
1064 related viruses by human monoclonal antibodies. *Science* 369:731-736.
- 1065 44. Zost SJ, Gilchuk P, Case JB, Binshtein E, Chen RE, Nkolola JP, Schäfer A, Reidy JX, Trivette A,  
1066 Nargi RS, Sutton RE, Suryadevara N, Martinez DR, Williamson LE, Chen EC, Jones T, Day S,  
1067 Myers L, Hassan AO, Kafai NM, Winkler ES, Fox JM, Shrihari S, Mueller BK, Meiler J,  
1068 Chandrashekar A, Mercado NB, Steinhardt JJ, Ren K, Loo YM, Kallewaard NL, McCune BT,  
1069 Keeler SP, Holtzman MJ, Barouch DH, Gralinski LE, Baric RS, Thackray LB, Diamond MS,  
1070 Carnahan RH, Crowe JE, Jr. 2020. Potently neutralizing and protective human antibodies against  
1071 SARS-CoV-2. *Nature* 584:443-449.
- 1072 45. Greaney AJ, Starr TN, Gilchuk P, Zost SJ, Binshtein E, Loes AN, Hilton SK, Huddleston J, Eguia  
1073 R, Crawford KH, Dingens AS, Nargi RS, Sutton RE, Suryadevara N, Rothlauf PW, Liu Z, Whelan  
1074 SP, Carnahan RH, Crowe JE, Bloom JD. 2020. Complete mapping of mutations to the SARS-  
1075 CoV-2 spike receptor-binding domain that escape antibody recognition. *bioRxiv*  
1076 doi:10.1101/2020.09.10.292078:2020.09.10.292078.
- 1077 46. Baum A, Copin R, Ajithdoss D, Zhou A, Lanza K, Negron N, Ni M, Wei Y, Atwal GS, Oyejide  
1078 A, Goetz-Gazi Y, Dutton J, Clemmons E, Staples HM, Bartley C, Klaffke B, Alfson K, Gazi M,  
1079 Gonzales O, Dick E, Carrion R, Pessaint L, Porto M, Cook A, Brown R, Ali V, Greenhouse J,  
1080 Taylor T, Andersen H, Lewis MG, Stahl N, Murphy AJ, Yancopoulos GD, Kyratsous CA. 2020.  
1081 REGN-COV2 antibody cocktail prevents and treats SARS-CoV-2 infection in rhesus macaques  
1082 and hamsters. *bioRxiv* doi:10.1101/2020.08.02.233320:2020.08.02.233320.
- 1083 47. Baum A, Fulton BO, Wloga E, Copin R, Pascal KE, Russo V, Giordano S, Lanza K, Negron N, Ni  
1084 M, Wei Y, Atwal GS, Murphy AJ, Stahl N, Yancopoulos GD, Kyratsous CA. 2020. Antibody  
1085 cocktail to SARS-CoV-2 spike protein prevents rapid mutational escape seen with individual  
1086 antibodies. *Science* 369:1014-1018.
- 1087 48. Barnes CO, West AP, Jr., Huey-Tubman KE, Hoffmann MAG, Sharaf NG, Hoffman PR, Koranda  
1088 N, Gristick HB, Gaebler C, Muecksch F, Lorenzi JCC, Finkin S, Hägglöf T, Hurley A, Millard  
1089 KG, Weisblum Y, Schmidt F, Hatziioannou T, Bieniasz PD, Caskey M, Robbiani DF,  
1090 Nussenzweig MC, Bjorkman PJ. 2020. Structures of Human Antibodies Bound to SARS-CoV-2  
1091 Spike Reveal Common Epitopes and Recurrent Features of Antibodies. *Cell* 182:828-842.e16.
- 1092 49. Alsoussi WB, Turner JS, Case JB, Zhao H, Schmitz AJ, Zhou JQ, Chen RE, Lei T, Rizk AA,  
1093 McIntire KM, Winkler ES, Fox JM, Kafai NM, Thackray LB, Hassan AO, Amanat F, Krammer F,  
1094 Watson CT, Kleinstein SH, Fremont DH, Diamond MS, Ellebedy AH. 2020. A Potently  
1095 Neutralizing Antibody Protects Mice against SARS-CoV-2 Infection. *J Immunol* 205:915-922.
- 1096 50. Salazar E, Kuchipudi SV, Christensen PA, Eagar T, Yi X, Zhao P, Jin Z, Long SW, Olsen RJ,  
1097 Chen J, Castillo B, Leveque C, Towers D, Lavinder JJ, Gollihar J, Cardona JA, Ippolito GC,  
1098 Nissly RH, Bird I, Greenawald D, Rossi RM, Gontu A, Srinivasan S, Poojary I, Cattadori IM,  
1099 Hudson P, Josleyn NM, Prugar L, Huie KE, Herbert AS, Bernard DW, Dye JM, Kapur V, Musser  
1100 JM. 2020. Convalescent plasma anti-SARS-CoV-2 spike protein ectodomain and receptor binding  
1101 domain IgG correlate with virus neutralization. *The Journal of Clinical Investigation*  
1102 doi:10.1172/JCI141206.
- 1103 51. Salazar E, Christensen PA, Graviss EA, Nguyen DT, Castillo B, Chen J, Lopez BV, Eagar TN, Yi  
1104 X, Zhao P, Rogers J, Shehabeldin A, Joseph D, Leveque C, Olsen RJ, Bernard DW, Gollihar J,  
1105 Musser JM. 2020. Treatment of COVID-19 Patients with Convalescent Plasma Reveals a Signal  
1106 of Significantly Decreased Mortality. *Am J Pathol* doi:10.1016/j.ajpath.2020.08.001.
- 1107 52. Starr TN, Greaney AJ, Hilton SK, Ellis D, Crawford KHD, Dingens AS, Navarro MJ, Bowen JE,  
1108 Tortorici MA, Walls AC, King NP, Veelsler D, Bloom JD. 2020. Deep Mutational Scanning of

- 1109 SARS-CoV-2 Receptor Binding Domain Reveals Constraints on Folding and ACE2 Binding. *Cell*  
1110 doi:10.1016/j.cell.2020.08.012.
- 1111 53. Steffen TL, Stone ET, Hassert M, Geerling E, Grimberg BT, Espino AM, Pantoja P, Climent C,  
1112 Hoft DF, George SL, Sariol CA, Pinto AK, Brien JD. 2020. The receptor binding domain of  
1113 SARS-CoV-2 spike is the key target of neutralizing antibody in human polyclonal sera. *bioRxiv*  
1114 doi:10.1101/2020.08.21.261727:2020.08.21.261727.
- 1115 54. Corbett KS, Flynn B, Foulds KE, Francica JR, Boyoglu-Barnum S, Werner AP, Flach B,  
1116 O'Connell S, Bock KW, Minai M, Nagata BM, Andersen H, Martinez DR, Noe AT, Douek N,  
1117 Donaldson MM, Nji NN, Alvarado GS, Edwards DK, Flebbe DR, Lamb E, Doria-Rose NA, Lin  
1118 BC, Louder MK, O'Dell S, Schmidt SD, Phung E, Chang LA, Yap C, Todd J-PM, Pessaint L, Van  
1119 Ry A, Browne S, Greenhouse J, Putman-Taylor T, Strasbaugh A, Campbell T-A, Cook A, Dodson  
1120 A, Steingrebe K, Shi W, Zhang Y, Abiona OM, Wang L, Pegu A, Yang ES, Leung K, Zhou T,  
1121 Teng I-T, Widge A, et al. 2020. Evaluation of the mRNA-1273 Vaccine against SARS-CoV-2 in  
1122 Nonhuman Primates. *New England Journal of Medicine* doi:10.1056/NEJMoa2024671.
- 1123 55. van Doremalen N, Lambe T, Spencer A, Belij-Rammerstorfer S, Purushotham JN, Port JR,  
1124 Avanzato VA, Bushmaker T, Flaxman A, Ulaszewska M, Feldmann F, Allen ER, Sharpe H,  
1125 Schulz J, Holbrook M, Okumura A, Meade-White K, Pérez-Pérez L, Edwards NJ, Wright D,  
1126 Bissett C, Gilbride C, Williamson BN, Rosenke R, Long D, Ishwarbhai A, Kailath R, Rose L,  
1127 Morris S, Powers C, Lovaglio J, Hanley PW, Scott D, Saturday G, de Wit E, Gilbert SC, Munster  
1128 VJ. 2020. ChAdOx1 nCoV-19 vaccine prevents SARS-CoV-2 pneumonia in rhesus macaques.  
1129 *Nature* doi:10.1038/s41586-020-2608-y.
- 1130 56. Wang C, Li W, Drabek D, Okba NMA, van Haperen R, Osterhaus A, van Kuppeveld FJM,  
1131 Haagmans BL, Grosveld F, Bosch BJ. 2020. A human monoclonal antibody blocking SARS-CoV-  
1132 2 infection. *Nat Commun* 11:2251.
- 1133 57. Ju B, Zhang Q, Ge J, Wang R, Sun J, Ge X, Yu J, Shan S, Zhou B, Song S, Tang X, Yu J, Lan J,  
1134 Yuan J, Wang H, Zhao J, Zhang S, Wang Y, Shi X, Liu L, Zhao J, Wang X, Zhang Z, Zhang L.  
1135 2020. Human neutralizing antibodies elicited by SARS-CoV-2 infection. *Nature* 584:115-119.
- 1136 58. Liu L, Wang P, Nair MS, Yu J, Rapp M, Wang Q, Luo Y, Chan JF, Sahi V, Figueroa A, Guo XV,  
1137 Cerutti G, Bimela J, Gorman J, Zhou T, Chen Z, Yuen KY, Kwong PD, Sodroski JG, Yin MT,  
1138 Sheng Z, Huang Y, Shapiro L, Ho DD. 2020. Potent neutralizing antibodies against multiple  
1139 epitopes on SARS-CoV-2 spike. *Nature* 584:450-456.
- 1140 59. Rogers TF, Zhao F, Huang D, Beutler N, Burns A, He W-t, Limbo O, Smith C, Song G, Woehl J,  
1141 Yang L, Abbott RK, Callaghan S, Garcia E, Hurtado J, Parren M, Peng L, Ramirez S, Ricketts J,  
1142 Ricciardi MJ, Rawlings SA, Wu NC, Yuan M, Smith DM, Nemazee D, Teijaro JR, Voss JE,  
1143 Wilson IA, Andrabi R, Briney B, Landais E, Sok D, Jardine JG, Burton DR. 2020. Isolation of  
1144 potent SARS-CoV-2 neutralizing antibodies and protection from disease in a small animal model.  
1145 *Science* 369:956-963.
- 1146 60. Hassan AO, Case JB, Winkler ES, Thackray LB, Kafai NM, Bailey AL, McCune BT, Fox JM,  
1147 Chen RE, Alsoussi WB, Turner JS, Schmitz AJ, Lei T, Shrihari S, Keeler SP, Fremont DH, Greco  
1148 S, McCray PB, Jr., Perlman S, Holtzman MJ, Ellebedy AH, Diamond MS. 2020. A SARS-CoV-2  
1149 Infection Model in Mice Demonstrates Protection by Neutralizing Antibodies. *Cell* 182:744-  
1150 753.e4.
- 1151 61. Chandrashekar A, Liu J, Martinot AJ, McMahan K, Mercado NB, Peter L, Tostanoski LH, Yu J,  
1152 Maliga Z, Nekorchuk M, Busman-Sahay K, Terry M, Wrijil LM, Ducat S, Martinez DR, Atyeo C,  
1153 Fischinger S, Burke JS, Slein MD, Pessaint L, Van Ry A, Greenhouse J, Taylor T, Blade K, Cook  
1154 A, Finneyfrock B, Brown R, Teow E, Velasco J, Zahn R, Wegmann F, Abbink P, Bondzie EA,  
1155 Dagotto G, Gebre MS, He X, Jacob-Dolan C, Kordana N, Li Z, Lifton MA, Mahrokhian SH,  
1156 Maxfield LF, Nityanandam R, Nkolola JP, Schmidt AG, Miller AD, Baric RS, Alter G, Sorger  
1157 PK, Estes JD, et al. 2020. SARS-CoV-2 infection protects against rechallenge in rhesus macaques.  
1158 *Science* 369:812-817.
- 1159 62. Mercado NB, Zahn R, Wegmann F, Loos C, Chandrashekar A, Yu J, Liu J, Peter L, McMahan K,  
1160 Tostanoski LH, He X, Martinez DR, Rutten L, Bos R, van Manen D, Vellinga J, Custers J,  
1161 Langedijk JP, Kwaks T, Bakkers MJG, Zuijdgeest D, Huber SKR, Atyeo C, Fischinger S, Burke  
1162 JS, Feldman J, Hauser BM, Caradonna TM, Bondzie EA, Dagotto G, Gebre MS, Hoffman E,  
1163 Jacob-Dolan C, Kirilova M, Li Z, Lin Z, Mahrokhian SH, Maxfield LF, Nampanya F,  
1164 Nityanandam R, Nkolola JP, Patel S, Ventura JD, Verrington K, Wan H, Pessaint L, Ry AV,

- 1165 Blade K, Strasbaugh A, Cabus M, et al. 2020. Single-shot Ad26 vaccine protects against SARS-  
1166 CoV-2 in rhesus macaques. *Nature* doi:10.1038/s41586-020-2607-z.
- 1167 63. Yuan M, Wu NC, Zhu X, Lee CD, So RTY, Lv H, Mok CKP, Wilson IA. 2020. A highly  
1168 conserved cryptic epitope in the receptor binding domains of SARS-CoV-2 and SARS-CoV.  
1169 *Science* 368:630-633.
- 1170 64. Hsieh C-L, Goldsmith JA, Schaub JM, DiVenere AM, Kuo H-C, Javanmardi K, Le KC, Wrapp D,  
1171 Lee AG, Liu Y, Chou C-W, Byrne PO, Hjorth CK, Johnson NV, Ludes-Meyers J, Nguyen AW,  
1172 Park J, Wang N, Amengor D, Lavinder JJ, Ippolito GC, Maynard JA, Finkelstein IJ, McLellan JS.  
1173 2020. Structure-based design of prefusion-stabilized SARS-CoV-2 spikes. *Science* 369:1501-  
1174 1505.
- 1175 65. Woo H, Park SJ, Choi YK, Park T, Tanveer M, Cao Y, Kern NR, Lee J, Yeom MS, Croll TI, Seok  
1176 C, Im W. 2020. Developing a Fully Glycosylated Full-Length SARS-CoV-2 Spike Protein Model  
1177 in a Viral Membrane. *J Phys Chem B* 124:7128-7137.
- 1178 66. Korber B, Fischer WM, Gnanakaran S, Yoon H, Theiler J, Abfalterer W, Hengartner N, Giorgi  
1179 EE, Bhattacharya T, Foley B, Hastie KM, Parker MD, Partridge DG, Evans CM, Freeman TM, de  
1180 Silva TI, McDanal C, Perez LG, Tang H, Moon-Walker A, Whelan SP, LaBranche CC, Saphire  
1181 EO, Montefiori DC. 2020. Tracking Changes in SARS-CoV-2 Spike: Evidence that D614G  
1182 Increases Infectivity of the COVID-19 Virus. *Cell* 182:812-827.e19.
- 1183 67. Hu J, He C-L, Gao Q-Z, Zhang G-J, Cao X-X, Long Q-X, Deng H-J, Huang L-Y, Chen J, Wang  
1184 K, Tang N, Huang A-L. 2020. D614G mutation of SARS-CoV-2 spike protein enhances viral  
1185 infectivity. *bioRxiv* doi:10.1101/2020.06.20.161323:2020.06.20.161323.
- 1186 68. Lorenzo-Redondo R, Nam HH, Roberts SC, Simons LM, Jennings LJ, Qi C, Achenbach CJ,  
1187 Hauser AR, Ison MG, Hultquist JF, Ozer EA. 2020. A Unique Clade of SARS-CoV-2 Viruses is  
1188 Associated with Lower Viral Loads in Patient Upper Airways. *medRxiv*  
1189 doi:10.1101/2020.05.19.20107144:2020.05.19.20107144.
- 1190 69. Cassia Wagner PR, Chris D. Frazar, Jover Lee, Nicola F. Müller, Louise H. Moncla, James  
1191 Hadfield, Emma B. Hodcroft, Benjamin Pelle, Matthew Richardson, Caitlin Behrens, Meei-Li  
1192 Huang, Patrick Mathias, Gregory Pepper, Lasata Shrestha, Hong Xie, Amin Addetia, Truong  
1193 Nguyen, Victoria M Rachleff, Romesh Gautam, Geoff Melly, Brian Hiatt, Philip Dykema,  
1194 Amanda Adler, Elisabeth Brandstetter, Peter D. Han, Kairsten Fay, Misja Ilcisin, Kirsten  
1195 Lacombe, Thomas R. Sibley, Melissa Truong, Caitlin R. Wolf, Karen Cowgill, Stephanie Schrag,  
1196 Jeff Duchin, Michael Boeckh, Janet A. Englund, Michael Famulare, Barry R. Lutz, Mark J.  
1197 Rieder, Matthew Thompson, Richard A. Neher, Geoffrey S. Baird, Lea M. Starita, Helen Y. Chu,  
1198 Jay Shendure, Scott Lindquist, Deborah A. Nickerson, Alexander L. Greninger, Keith R. Jerome,  
1199 Trevor Bedford. 2020. Comparing viral load and clinical outcomes in Washington State across  
1200 D614G substitution in spike protein of SARS-CoV-2. <https://github.com/blab/ncov-wa-d614g>.  
1201 Accessed September 8.
- 1202 70. Volz EM, Hill V, McCrone JT, Price A, Jorgensen D, O'Toole A, Southgate JA, Johnson R,  
1203 Jackson B, Nascimento FF, Rey SM, Nicholls SM, Colquhoun RM, da Silva Filipe A, Shepherd  
1204 JG, Pascall DJ, Shah R, Jesudason N, Li K, Jarrett R, Pacchiarini N, Bull M, Geidelberg L,  
1205 Siveroni I, Goodfellow IG, Loman NJ, Pybus O, Robertson DL, Thomson EC, Rambaut A,  
1206 Connor TR. 2020. Evaluating the effects of SARS-CoV-2 Spike mutation D614G on  
1207 transmissibility and pathogenicity. *medRxiv*  
1208 doi:10.1101/2020.07.31.20166082:2020.07.31.20166082.
- 1209 71. Lv Z, Deng Y-Q, Ye Q, Cao L, Sun C-Y, Fan C, Huang W, Sun S, Sun Y, Zhu L, Chen Q, Wang  
1210 N, Nie J, Cui Z, Zhu D, Shaw N, Li X-F, Li Q, Xie L, Wang Y, Rao Z, Qin C-F, Wang X. 2020.  
1211 Structural basis for neutralization of SARS-CoV-2 and SARS-CoV by a potent therapeutic  
1212 antibody. *Science* 369:1505-1509.
- 1213 72. Yurkovetskiy L, Wang X, Pascal KE, Tomkins-Tinch C, Nyalile T, Wang Y, Baum A, Diehl WE,  
1214 Dauphin A, Carbone C, Veinotte K, Egri SB, Schaffner SF, Lemieux JE, Munro J, Rafique A,  
1215 Barve A, Sabeti PC, Kyratsous CA, Dudkina N, Shen K, Luban J. 2020. Structural and Functional  
1216 Analysis of the D614G SARS-CoV-2 Spike Protein Variant. *bioRxiv*  
1217 doi:10.1101/2020.07.04.187757:2020.07.04.187757.
- 1218 73. Zhang L, Jackson CB, Mou H, Ojha A, Rangarajan ES, IZard T, Farzan M, Choe H. 2020. The  
1219 D614G mutation in the SARS-CoV-2 spike protein reduces S1 shedding and increases infectivity.  
1220 *bioRxiv* doi:10.1101/2020.06.12.148726:2020.06.12.148726.

- 1221 74. Huo J, Zhao Y, Ren J, Zhou D, Duyvesteyn HME, Ginn HM, Carrique L, Malinauskas T, Ruza  
1222 RR, Shah PNM, Tan TK, Rijal P, Coombes N, Bewley KR, Tree JA, Radecke J, Paterson NG,  
1223 Supasa P, Mongkolsapaya J, Screaton GR, Carroll M, Townsend A, Fry EE, Owens RJ, Stuart DI.  
1224 2020. Neutralization of SARS-CoV-2 by Destruction of the Prefusion Spike. *Cell Host Microbe*  
1225 doi:10.1016/j.chom.2020.06.010.
- 1226 75. Long SW, Olsen RJ, Christensen PA, Bernard DW, Davis JR, Shukla M, Nguyen M, Ojeda  
1227 Saavedra M, Cantu CC, Yerramilli P, Pruitt L, Subedi S, Hendrickson H, Eskandari G,  
1228 Kumaraswami M, McLellan JS, Musser JM. 2020. Molecular Architecture of Early Dissemination  
1229 and Evolution of the SARS-CoV-2 Virus in Metropolitan Houston, Texas. *bioRxiv*  
1230 doi:10.1101/2020.05.01.072652:2020.05.01.072652.
- 1231 76. Plante JA, Liu Y, Liu J, Xia H, Johnson BA, Lokugamage KG, Zhang X, Muruato AE, Zou J,  
1232 Fontes-Garfias CR, Mirchandani D, Scharton D, Bilello JP, Ku Z, An Z, Kalveram B, Freiberg  
1233 AN, Menachery VD, Xie X, Plante KS, Weaver SC, Shi P-Y. 2020. Spike mutation D614G alters  
1234 SARS-CoV-2 fitness and neutralization susceptibility. *bioRxiv*  
1235 doi:10.1101/2020.09.01.278689:2020.09.01.278689.
- 1236 77. Latz CA, DeCarlo C, Boitano L, Png CYM, Patell R, Conrad MF, Eagleton M, Dua A. 2020.  
1237 Blood type and outcomes in patients with COVID-19. *Ann Hematol* 99:2113-2118.
- 1238 78. Wu BB, Gu DZ, Yang J, Shen WQ. 2020. Association between ABO blood groups and  
1239 COVID-19 infection, severity and demise: A systematic review and meta-analysis. *Infect Genet*  
1240 *Evol* 84:104485.
- 1241 79. Zhao J, Yang Y, Huang H, Li D, Gu D, Lu X, Zhang Z, Liu L, Liu T, Liu Y, He Y, Sun B, Wei M,  
1242 Yang G, Wang X, Zhang L, Zhou X, Xing M, Wang PG. 2020. Relationship between the ABO  
1243 Blood Group and the COVID-19 Susceptibility. *Clin Infect Dis* doi:10.1093/cid/ciaa1150.
- 1244 80. Zietz M, Tatonetti NP. 2020. Testing the association between blood type and COVID-19 infection,  
1245 intubation, and death. *medRxiv* doi:10.1101/2020.04.08.20058073.
- 1246 81. Lemieux J, Siddle KJ, Shaw BM, Loreth C, Schaffner S, Gladden-Young A, Adams G, Fink T,  
1247 Tomkins-Tinch CH, Krasilnikova LA, Deruff KC, Rudy M, Bauer MR, Lagerborg KA,  
1248 Normandin E, Chapman SB, Reilly SK, Anahtar MN, Lin AE, Carter A, Myhrvold C, Kembal M,  
1249 Chaluvadi S, Cusick C, Flowers K, Neumann A, Cerrato F, Farhat M, Slater D, Harris JB, Branda  
1250 J, Hooper D, Gaeta JM, Baggett TP, O'Connell J, Gnrirke A, Lieberman TD, Philippakis A, Burns  
1251 M, Brown C, Luban J, Ryan ET, Turbett SE, LaRocque RC, Hanage WP, Gallagher G, Madoff  
1252 LC, Smole S, Pierce VM, Rosenberg ES, et al. 2020. Phylogenetic analysis of SARS-CoV-2 in the  
1253 Boston area highlights the role of recurrent importation and superspreading events. *medRxiv*  
1254 doi:10.1101/2020.08.23.20178236:2020.08.23.20178236.
- 1255 82. Gudbjartsson DF, Helgason A, Jonsson H, Magnusson OT, Melsted P, Norddahl GL,  
1256 Saemundsdottir J, Sigurdsson A, Sulem P, Agustsdottir AB, Eiriksdottir B, Fridriksdottir R,  
1257 Gardarsdottir EE, Georgsson G, Gretarsdottir OS, Gudmundsson KR, Gunnarsdottir TR, Gylfason  
1258 A, Holm H, Jensson BO, Jonasdottir A, Jonsson F, Josefsdottir KS, Kristjansson T, Magnusdottir  
1259 DN, le Roux L, Sigmundsdottir G, Sveinbjornsson G, Sveinsdottir KE, Sveinsdottir M,  
1260 Thorarensen EA, Thorbjornsson B, Löve A, Masson G, Jonsdottir I, Möller AD, Gudnason T,  
1261 Kristinnsson KG, Thorsteinsdottir U, Stefansson K. 2020. Spread of SARS-CoV-2 in the Icelandic  
1262 Population. *N Engl J Med* doi:10.1056/NEJMoa2006100.
- 1263 83. Candido DS, Claro IM, de Jesus JG, Souza WM, Moreira FRR, Dellicour S, Mellan TA, du  
1264 Plessis L, Pereira RHM, Sales FCS, Manuli ER, Thézé J, Almeida L, Menezes MT, Voloch CM,  
1265 Fumagalli MJ, Coletti TM, da Silva CAM, Ramundo MS, Amorim MR, Hoeltgebaum HH, Mishra  
1266 S, Gill MS, Carvalho LM, Buss LF, Prete CA, Ashworth J, Nakaya HI, Peixoto PS, Brady OJ,  
1267 Nicholls SM, Tanuri A, Rossi ÁD, Braga CKV, Gerber AL, de C. Guimarães AP, Gaburo N,  
1268 Alencar CS, Ferreira ACS, Lima CX, Levi JE, Granato C, Ferreira GM, Francisco RS, Granja F,  
1269 Garcia MT, Moretti ML, Perroud MW, Castiñeiras TMPP, Lazari CS, et al. 2020. Evolution and  
1270 epidemic spread of SARS-CoV-2 in Brazil. *Science* 369:1255-1260.
- 1271 84. Ellinghaus D, Degenhardt F, Bujanda L, Buti M, Albillos A, Invernizzi P, Fernández J, Prati D,  
1272 Baselli G, Asselta R, Grimsrud MM, Milani C, Aziz F, Kässens J, May S, Wendorff M,  
1273 Wienbrandt L, Uellendahl-Werth F, Zheng T, Yi X, de Pablo R, Chercoles AG, Palom A, Garcia-  
1274 Fernandez AE, Rodriguez-Frias F, Zanella A, Bandera A, Protti A, Aghemo A, Lleo A, Biondi A,  
1275 Caballero-Garralda A, Gori A, Tanck A, Carreras Nolla A, Latiano A, Fracanzani AL, Peschuck  
1276 A, Julià A, Pesenti A, Voza A, Jiménez D, Mateos B, Nafria Jimenez B, Quereda C, Paccapelo C,

- 1277 Gassner C, Angelini C, Cea C, Solier A, et al. 2020. Genomewide Association Study of Severe  
1278 Covid-19 with Respiratory Failure. *N Engl J Med* doi:10.1056/NEJMoa2020283.
- 1279 85. 2020. The COVID-19 Host Genetics Initiative, a global initiative to elucidate the role of host  
1280 genetic factors in susceptibility and severity of the SARS-CoV-2 virus pandemic. *Eur J Hum*  
1281 *Genet* 28:715-718.
- 1282 86. Weisblum Y, Schmidt F, Zhang F, DaSilva J, Poston D, Lorenzi JCC, Muecksch F, Rutkowska M,  
1283 Hoffmann H-H, Michailidis E, Gaebler C, Agudelo M, Cho A, Wang Z, Gazumyan A, Cipolla M,  
1284 Luchsinger L, Hillyer CD, Caskey M, Robbiani DF, Rice CM, Nussenzweig MC, Hatzioannou T,  
1285 Bieniasz PD. 2020. Escape from neutralizing antibodies by SARS-CoV-2 spike protein variants.  
1286 bioRxiv doi:10.1101/2020.07.21.214759:2020.07.21.214759.
- 1287 87. Li T, Han X, Wang Y, Gu C, Wang J, Hu C, Li S, Wang K, Luo F, Huang J, Long Y, Song S,  
1288 Wang W, Hu J, Wu R, Mu S, Hao Y, Chen Q, Gao F, Shen M, Long S, Gong F, Li L, Wu Y, Xu  
1289 W, Cai X, Qu D, Yuan Z, Gao Q, Zhang G, He C, Nai Y, Deng K, Du L, Tang N, Xie Y, Huang  
1290 A, Jin A. 2020. A key linear epitope for a potent neutralizing antibody to SARS-CoV-2 S-RBD.  
1291 bioRxiv doi:10.1101/2020.09.11.292631:2020.09.11.292631.
- 1292 88. Hansen J, Baum A, Pascal KE, Russo V, Giordano S, Wloga E, Fulton BO, Yan Y, Koon K, Patel  
1293 K, Chung KM, Hermann A, Ullman E, Cruz J, Rafique A, Huang T, Fairhurst J, Liberty C,  
1294 Malbec M, Lee W-y, Welsh R, Farr G, Pennington S, Deshpande D, Cheng J, Watty A, Bouffard  
1295 P, Babb R, Levenkova N, Chen C, Zhang B, Romero Hernandez A, Saotome K, Zhou Y, Franklin  
1296 M, Sivapalasingam S, Lye DC, Weston S, Logue J, Haupt R, Frieman M, Chen G, Olson W,  
1297 Murphy AJ, Stahl N, Yancopoulos GD, Kyratsous CA. 2020. Studies in humanized mice and  
1298 convalescent humans yield a SARS-CoV-2 antibody cocktail. *Science* 369:1010-1014.
- 1299 89. Long SW, Olsen RJ, Eagar TN, Beres SB, Zhao P, Davis JJ, Brettin T, Xia F, Musser JM. 2017.  
1300 Population Genomic Analysis of 1,777 Extended-Spectrum Beta-Lactamase-Producing  
1301 *Klebsiella pneumoniae* Isolates, Houston, Texas: Unexpected Abundance of Clonal  
1302 Group 307. *mBio* 8:e00489-17.
- 1303 90. Stucker KM, Schobel SA, Olsen RJ, Hodges HL, Lin X, Halpin RA, Fedorova N, Stockwell TB,  
1304 Tovchigrechko A, Das SR, Wentworth DE, Musser JM. 2015. Haemagglutinin mutations and  
1305 glycosylation changes shaped the 2012/13 influenza A(H3N2) epidemic, Houston, Texas. *Euro*  
1306 *Surveill* 20.
- 1307 91. Katoh K, Standley DM. 2013. MAFFT multiple sequence alignment software version 7:  
1308 improvements in performance and usability. *Mol Biol Evol* 30:772-80.
- 1309 92. Waterhouse AM, Procter JB, Martin DM, Clamp M, Barton GJ. 2009. Jalview Version 2--a  
1310 multiple sequence alignment editor and analysis workbench. *Bioinformatics* 25:1189-91.
- 1311 93. Price MN, Dehal PS, Arkin AP. 2010. FastTree 2--approximately maximum-likelihood trees for  
1312 large alignments. *PLoS One* 5:e9490.
- 1313 94. Chen T, Guestrin C. 2016. XGBoost: A Scalable Tree Boosting System, abstr Proceedings of the  
1314 22nd ACM SIGKDD International Conference on Knowledge Discovery and Data Mining, San  
1315 Francisco, California, USA, Association for Computing Machinery,
- 1316 95. Nguyen M, Brettin T, Long SW, Musser JM, Olsen RJ, Olson R, Shukla M, Stevens RL, Xia F,  
1317 Yoo H. 2018. Developing an in silico minimum inhibitory concentration panel test for *Klebsiella*  
1318 *pneumoniae*. *Scientific reports* 8:421.
- 1319 96. Nguyen M, Long SW, McDermott PF, Olsen RJ, Olson R, Stevens RL, Tyson GH, Zhao S, Davis  
1320 JJ. 2019. Using machine learning to predict antimicrobial MICs and associated genomic features  
1321 for nontyphoidal *Salmonella*. *Journal of Clinical Microbiology* 57:e01260-18.
- 1322 97. Pedregosa F, Varoquaux, G., Gramfort, A., Michel, V., Thirion, B., Grisel, O., Blondel, M.,  
1323 Prettenhofer, P., Weiss, R., Dubourg, V., Vanderplas, J., Passos, A., Cournapeau, D., Brucher, M.,  
1324 Perrot, M., and Duchesnay, E. 2011. Scikit-learn: Machine Learning in Python. *Journal of*  
1325 *Machine Learning Research* 12 (2011) 2825-2830.
- 1326 98. Cai Y, Zhang J, Xiao T, Peng H, Sterling SM, Walsh RM, Jr., Rawson S, Rits-Volloch S, Chen B.  
1327 2020. Distinct conformational states of SARS-CoV-2 spike protein. *Science*  
1328 doi:10.1126/science.abd4251.
- 1329



It is made available under a [CC-BY-NC-ND 4.0 International license](https://creativecommons.org/licenses/by-nc-nd/4.0/).

A

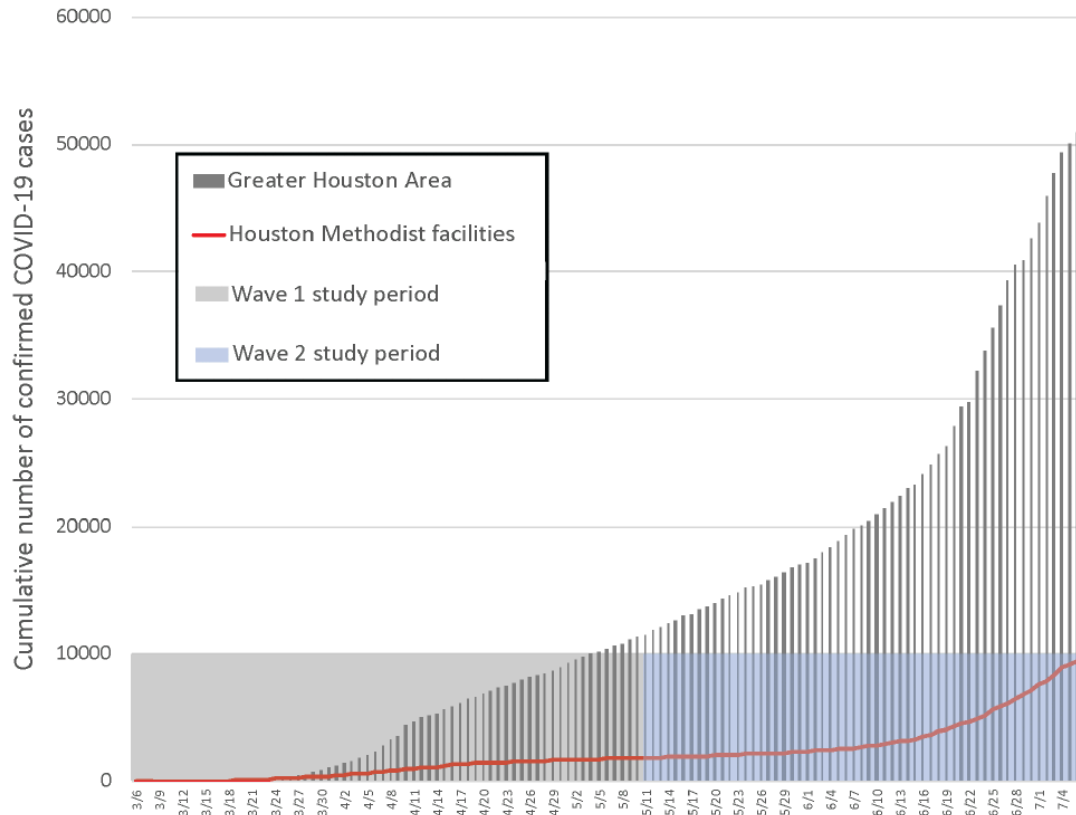

B

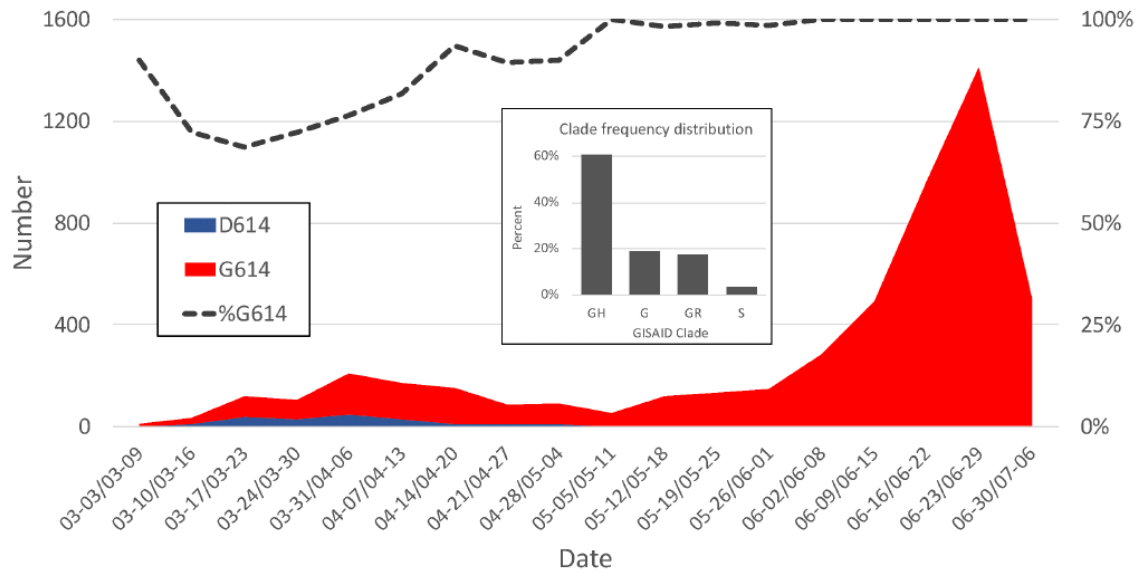

1330

1331 **FIG 1** (A) Confirmed COVID-19 cases in the Greater Houston Metropolitan region.  
1332 Cumulative number of COVID-19 patients over time through July 7, 2020. Counties  
1333 include Austin, Brazoria, Chambers, Fort Bend, Galveston, Harris, Liberty, Montgomery,  
1334 and Waller. The shaded area represents the time period during which virus genomes  
1335 characterized in this study were recovered from COVID-19 patients. The red line  
1336 represents the number of COVID-19 patients diagnosed in the Houston Methodist  
1337 Hospital Molecular Diagnostic Laboratory. (B) Distribution of strains with either the  
1338 Asp614 or Gly614 amino acid variant in spike protein among the two waves of COVID-  
1339 19 patients diagnosed in the Houston Methodist Hospital Molecular Diagnostic  
1340 Laboratory. The large inset shows major clade frequency for the time frame studied.  
1341

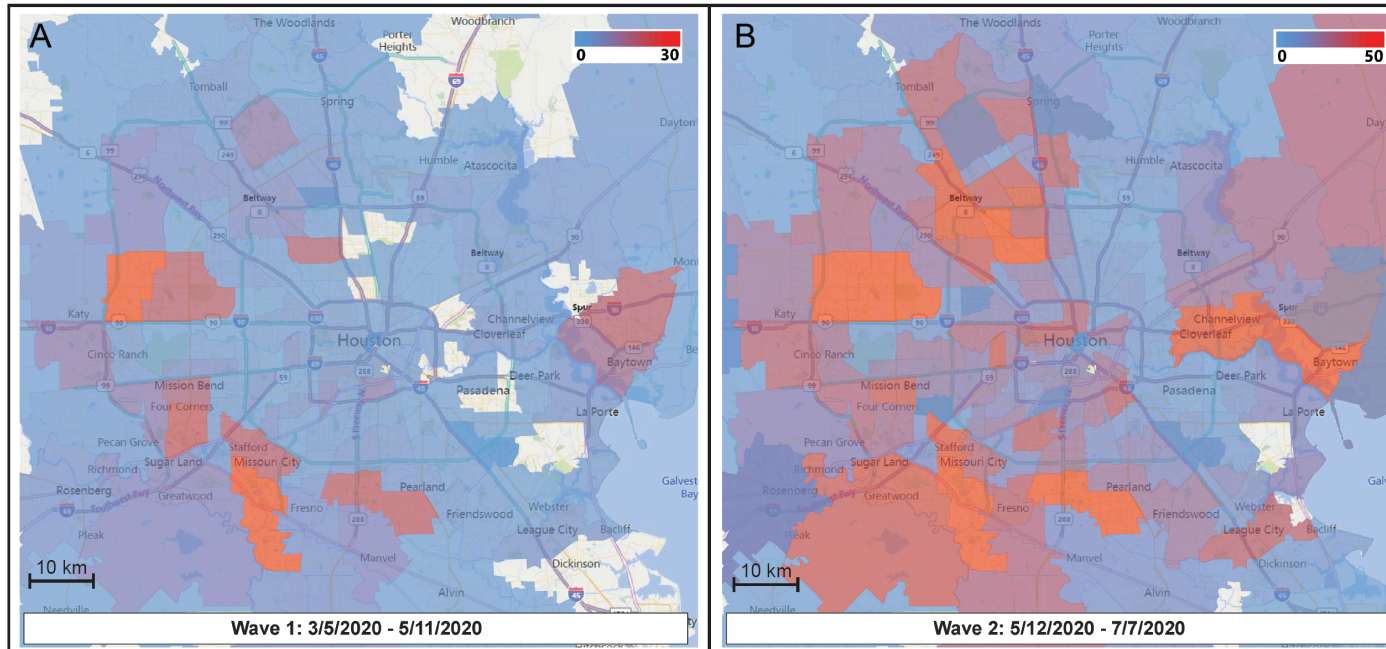

1342

1343 **FIG 2** Sequential time-series heatmaps for all COVID-19 Houston Methodist patients  
1344 during the study period. Geospatial distribution of COVID-19 patients is based on zip  
1345 code. Panel A (left) shows geospatial distribution of sequenced SARS-CoV-2 strains in  
1346 wave 1 and panel B (right) shows wave 2 distribution. The collection dates are shown at  
1347 the bottom of each panel. The insets refer to City numbers of strains in the color spectrum  
1348 used. Note difference in numbers of strains used in panel A and panel B insets.

1349

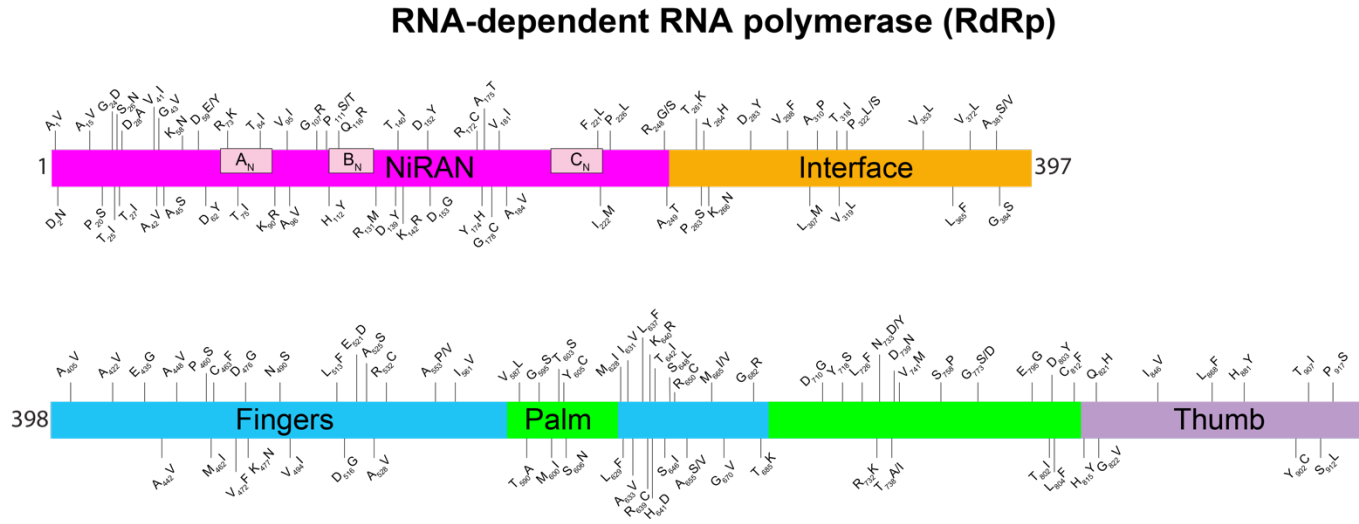

1350

1351 **FIG 3** Location of amino acid replacements in RNA-dependent RNA polymerase  
1352 (RdRp/Nsp12) among the 5,085 genomes of SARS-CoV-2 sequenced. The various  
1353 RdRp domains are color-coded. The numbers refer to amino acid site. Note that several  
1354 amino acid sites have multiple variants identified.

1355

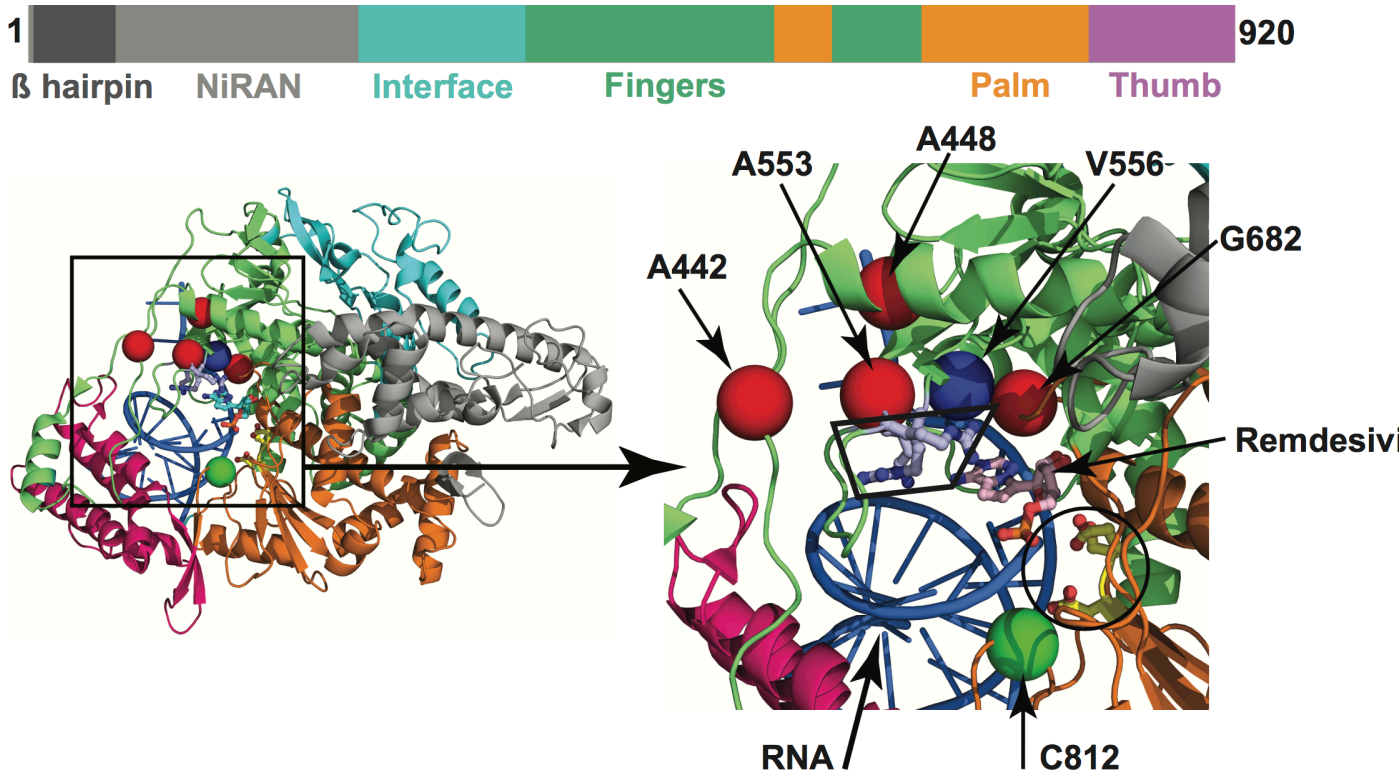

1356

1357 **FIG 4** Amino acid changes identified in Nsp12 (RdRp) in this study that may influence  
1358 interaction with remdesivir. The schematic at the top shows the domain architecture of  
1359 Nsp12. (Left) Ribbon representation of the crystal structure of Nsp12-remdesivir  
1360 monophosphate-RNA complex (PDB code: 7BV2). The structure in the right panel  
1361 shows a magnified view of the boxed area in the left panel. The Nsp12 domains are  
1362 colored as in the schematic at the top. The catalytic site in Nsp12 is marked by a black  
1363 circle in the right panel. The side chains of amino acids comprising the catalytic site of  
1364 RdRp (Ser758, Asp759, and Asp760) are shown as balls and stick and colored yellow.  
1365 The nucleotide binding site is boxed in the right panel. The side chains of amino acids  
1366 participating in nucleotide binding (Lys544, Arg552, and Arg554) are shown as balls and  
1367 sticks and colored light blue. Remdesivir molecule incorporated into the nascent RNA is  
1368 shown as balls and sticks and colored light pink. The RNA is shown as a blue cartoon  
1369 and bases are shown as sticks. The positions of C $\alpha$  atoms of amino acids identified in

1370 this study are shown as red and green spheres and labeled. The amino acids that are  
1371 shown as red spheres are located above the nucleotide binding site, whereas Cys812  
1372 located at the catalytic site is shown as a green sphere. The side chain of active site  
1373 residue Ser758 is shown as ball and sticks and colored yellow. The location of C $\alpha$  atoms  
1374 of remdesivir resistance conferring amino acid Val556 is shown as blue sphere and  
1375 labeled.  
1376

It is made available under a [CC-BY-NC-ND 4.0 International license](https://creativecommons.org/licenses/by-nc-nd/4.0/).

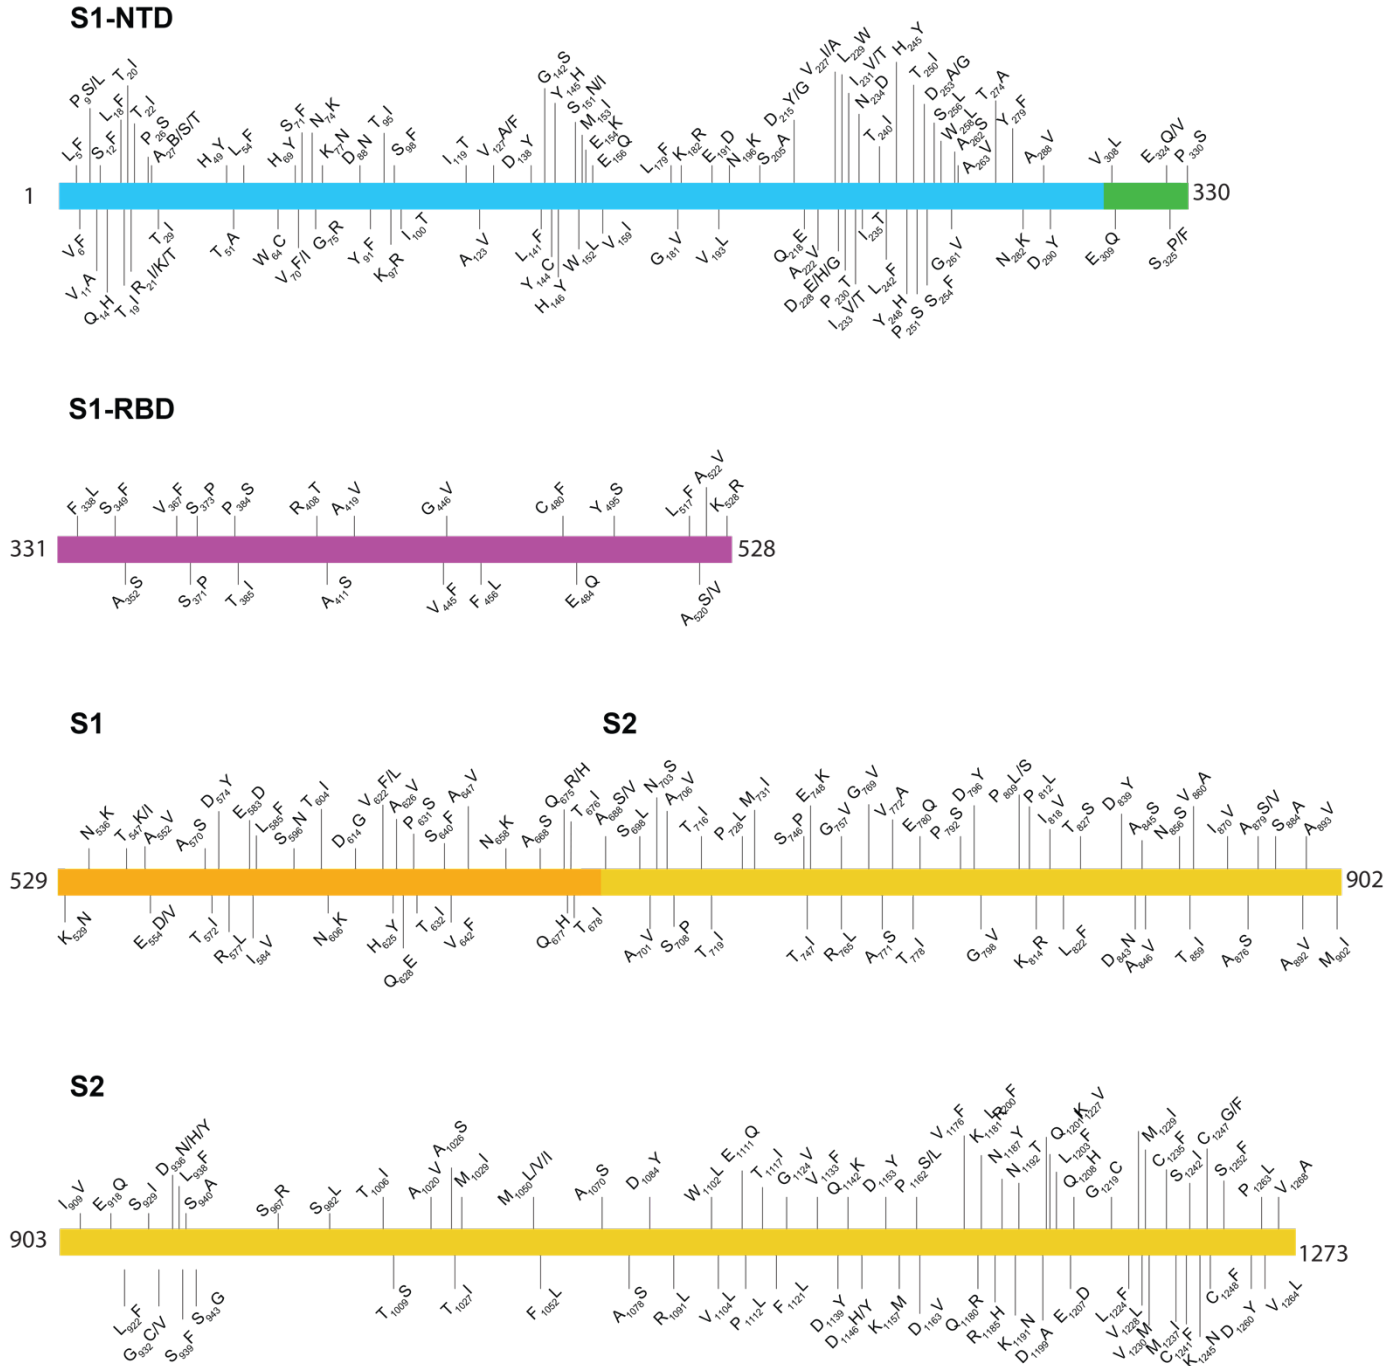

1377

1378 **FIG 5** Location of amino acid replacements in spike protein among the 5,085 genomes  
 1379 of SARS-CoV-2 sequenced. The various spike protein domains are color-coded. The  
 1380 numbers refer to amino acid site. Note that many amino acid sites have multiple variants  
 1381 identified.

1382

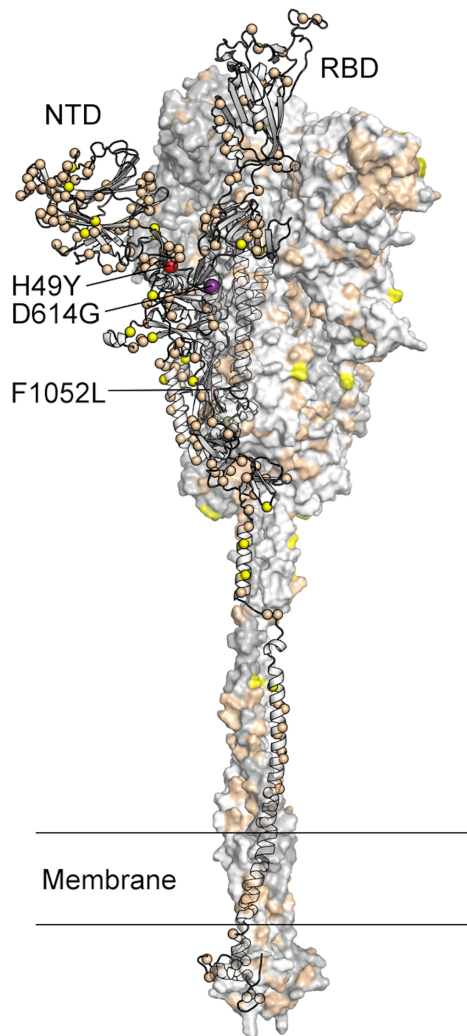

1383

1384 **FIG 6** Location of amino acid substitutions mapped on the SARS-CoV-2 spike protein.

1385 Model of the SARS-CoV-2 spike protein with one protomer shown as ribbons and the

1386 other two protomers shown as a molecular surface. The C $\alpha$  atom of residues found to be

1387 substituted in one or more virus isolates identified in this study is shown as a sphere on

1388 the ribbon representation. Residues found to be substituted in 1–9 isolates are colored

1389 tan, 10–99 isolates yellow, 100–999 isolates colored red (H49Y and F1052L), and >1000

1390 isolates purple (D614G). The surface of the aminoterminal domain (NTD) that is distal to



1391 the trimeric axis has a high density of substituted residues. RBD, receptor binding  
1392 domain.

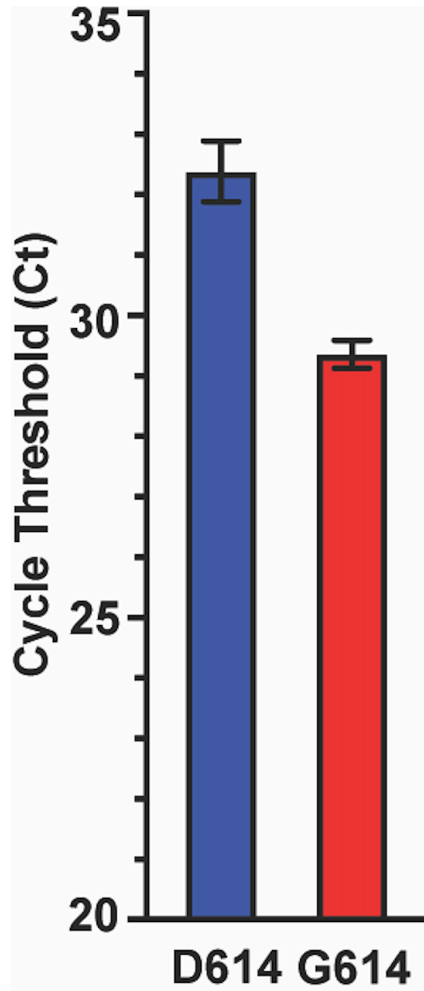

1393

1394 **FIG 7** Cycle threshold (Ct) for every SARS-CoV-2 patient sample tested using the  
1395 Hologic Panther assay. Data are presented as mean +/- standard error of the mean for  
1396 strains with an aspartate (D614,  $n=102$  strains, blue) or glycine (G614,  $n=812$  strains,  
1397 red) at amino acid 614 of the spike protein. Mann-Whitney test,  $*P<0.0001$ .

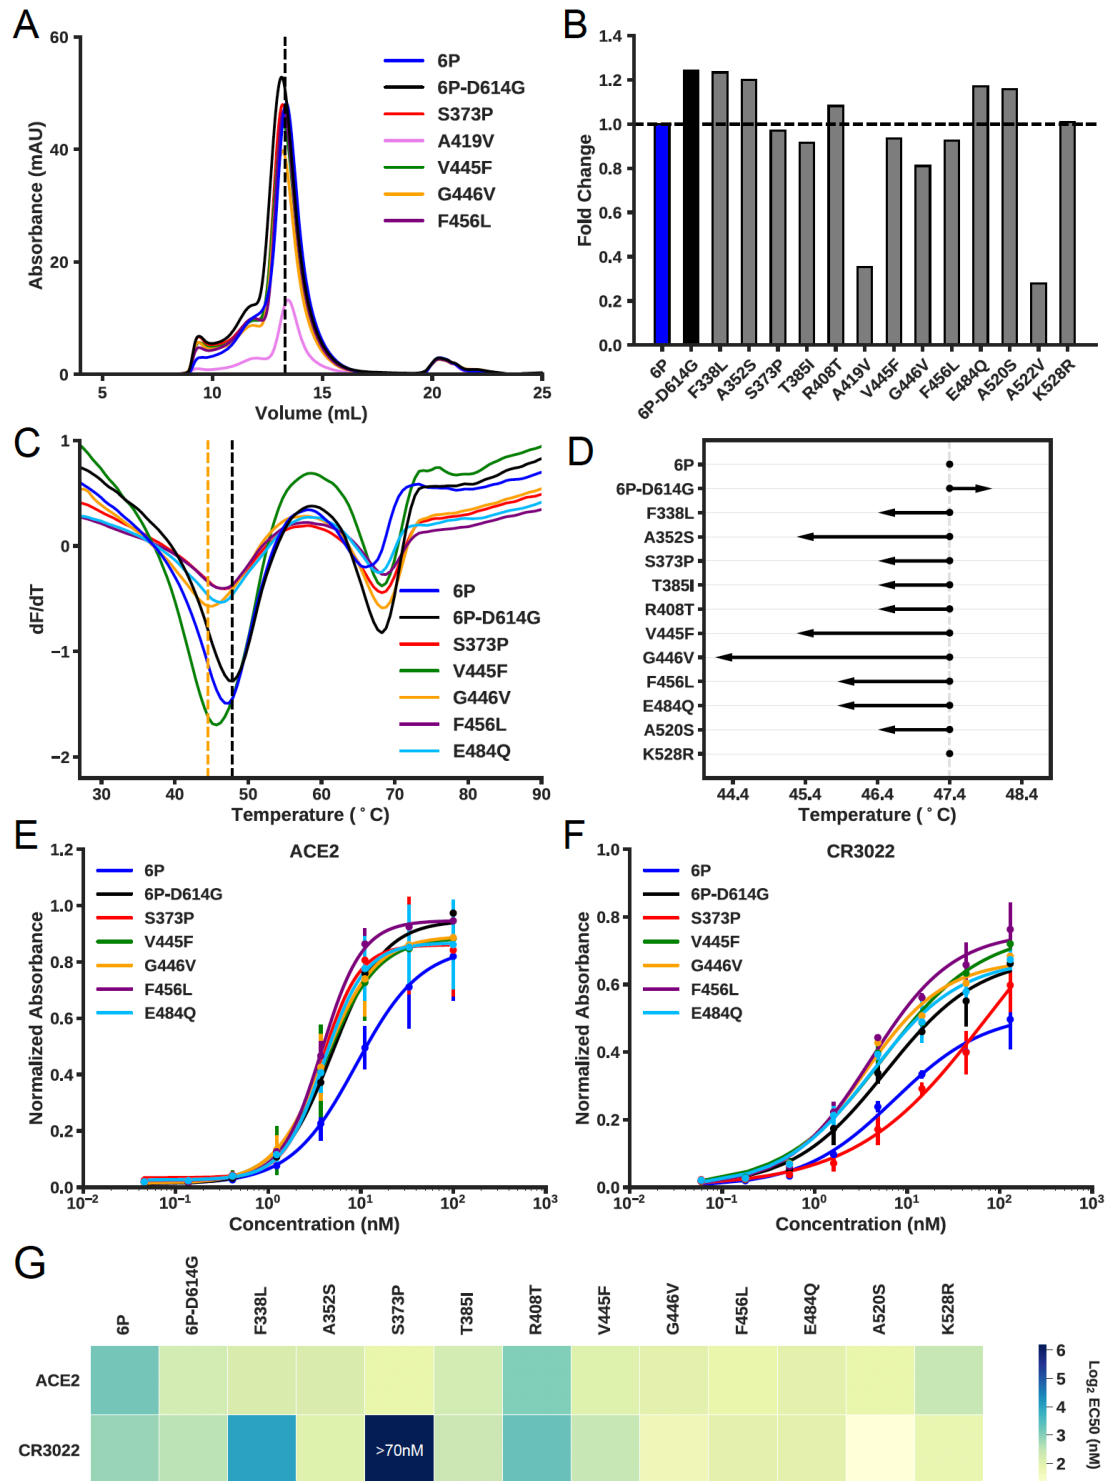

1398

1399 **FIG 8** Biochemical characterization of spike RBD variants. (A) Size-exclusion  
 1400 chromatography (SEC) traces of the indicated spike-RBD variants. Dashed line indicates  
 1401 the elution peak of spike-6P. (B) The relative expression of all RBD variants as

1402 determined by the area under the SEC traces. All expression levels are normalized  
1403 relative to spike-6P. (C) Thermostability analysis of RBD variants by differential scanning  
1404 fluorimetry. Each sample had three replicates and only mean values were plotted. Black  
1405 vertical dashed line indicates the first melting temperature of 6P-D614G and orange  
1406 vertical dashed line indicates the first melting temperature of the least stable variant  
1407 (spike-G446V). (D) First apparent melting temperature of all RBD variants. (E) ELISA-  
1408 based binding affinities for ACE2 and (F) the neutralizing antibody CR3022 to the  
1409 indicated RBD variants. (G) Summary of EC50s for all measured RBD variants.  
1410  
1411

1412 **Table 1.** Nonsynonymous SNPs of SARS-CoV-2 *nsp12*.

| <b>Genomic Locus</b> | <b>Gene Locus</b> | <b>Amino Acid Change</b> | <b>Domain</b> | <b>Wave 1 (n=1026)</b> | <b>Wave 2 (n=4059)</b> | <b>Total (n=5085)</b> |
|----------------------|-------------------|--------------------------|---------------|------------------------|------------------------|-----------------------|
| 13446                | C3T               | A1V                      | N-terminus    |                        | 2                      | 2                     |
| 13448                | G5A               | D2N                      | N-terminus    | 1                      |                        | 1                     |
| 13487                | C44T              | A15V                     | N-terminus    |                        | 138                    | 138                   |
| 13501                | C58T              | P20S                     | N-terminus    |                        | 1                      | 1                     |
| 13514                | G71A              | G24D                     | N-terminus    |                        | 3                      | 3                     |
| 13517                | C74T              | T25I                     | N-terminus    |                        | 4                      | 4                     |
| 13520                | G77A              | S26N                     | N-terminus    |                        | 1                      | 1                     |
| 13523                | C80T              | T27I                     | N-terminus    |                        | 1                      | 1                     |
| 13526                | A83C              | D28A                     | N-terminus    |                        | 1                      | 1                     |
| 13564                | G121A             | V41I                     | B hairpin     |                        | 1                      | 1                     |
| 13568                | C125T             | A42V                     | B hairpin     | 1                      |                        | 1                     |
| 13571                | G128T             | G43V                     | B hairpin     | 1                      |                        | 1                     |
| 13576                | G133T             | A45S                     | B hairpin     |                        | 12                     | 12                    |
| 13617                | G174T             | K58N                     | NiRAN         |                        | 1                      | 1                     |
| 13618                | G175T             | D59Y                     | NiRAN         |                        | 24                     | 24                    |
| 13620                | C177G             | D59E                     | NiRAN         |                        | 1                      | 1                     |
| 13627                | G184T             | D62Y                     | NiRAN         | 1                      |                        | 1                     |
| 13661                | G218A             | R73K                     | NiRAN         |                        | 1                      | 1                     |
| 13667                | C224T             | T75I                     | NiRAN         |                        | 2                      | 2                     |
| 13694                | C251T             | T84I                     | NiRAN         |                        | 1                      | 1                     |
| 13712                | A269G             | K90R                     | NiRAN         |                        | 1                      | 1                     |
| 13726                | G283A             | V95I                     | NiRAN         |                        | 1                      | 1                     |
| 13730                | C287T             | A96V                     | NiRAN         | 2                      | 2                      | 4                     |
| 13762                | G319C             | G107R                    | NiRAN         |                        | 1                      | 1                     |
| 13774                | C331A             | P111T                    | NiRAN         |                        | 1                      | 1                     |
| 13774                | C331T             | P111S                    | NiRAN         |                        | 15                     | 15                    |
| 13777                | C334T             | H112Y                    | NiRAN         |                        | 1                      | 1                     |
| 13790                | A347G             | Q116R                    | NiRAN         |                        | 2                      | 2                     |
| 13835                | G392T             | R131M                    | NiRAN         |                        | 1                      | 1                     |
| 13858                | G415T             | D139Y                    | NiRAN         |                        | 3                      | 3                     |
| 13862                | C419T             | T140I                    | NiRAN         | 1                      | 5                      | 6                     |
| 13868                | A425G             | K142R                    | NiRAN         | 1                      |                        | 1                     |
| 13897                | G454T             | D152Y                    | NiRAN         |                        | 4                      | 4                     |
| 13901                | A458G             | D153G                    | NiRAN         |                        | 2                      | 2                     |
| 13957                | C514T             | R172C                    | NiRAN         |                        | 2                      | 2                     |
| 13963                | T520C             | Y174H                    | NiRAN         |                        | 1                      | 1                     |
| 13966                | G523A             | A175T                    | NiRAN         |                        | 1                      | 1                     |
| 13975                | G532T             | G178C                    | NiRAN         |                        | 4                      | 4                     |

| <b>Genomic Locus</b> | <b>Gene Locus</b> | <b>Amino Acid Change</b> | <b>Domain</b> | <b>Wave 1 (n=1026)</b> | <b>Wave 2 (n=4059)</b> | <b>Total (n=5085)</b> |
|----------------------|-------------------|--------------------------|---------------|------------------------|------------------------|-----------------------|
| 13984                | G541A             | V181I                    | NiRAN         |                        | 1                      | 1                     |
| 13994                | C551T             | A184V                    | NiRAN         |                        | 8                      | 8                     |
| 14104                | T661C             | F221L                    | NiRAN         | 2                      |                        | 2                     |
| 14109                | A666G             | I222M                    | NiRAN         | 1                      |                        | 1                     |
| 14120                | C677T             | P226L                    | NiRAN         |                        | 2                      | 2                     |
| 14185                | A742G             | R248G                    | NiRAN         |                        | 1                      | 1                     |
| 14187                | G744T             | R248S                    | NiRAN         |                        | 1                      | 1                     |
| 14188                | G745A             | A249T                    | NiRAN         |                        | 1                      | 1                     |
| 14225                | C782A             | T261K                    | Interface     |                        | 4                      | 4                     |
| 14230                | C787T             | P263S                    | Interface     |                        | 1                      | 1                     |
| 14233                | T790C             | Y264H                    | Interface     |                        | 1                      | 1                     |
| 14241                | G798T             | K266N                    | Interface     |                        | 1                      | 1                     |
| 14290                | G847T             | D283Y                    | Interface     |                        | 1                      | 1                     |
| 14335                | G892T             | V298F                    | Interface     |                        | 8                      | 8                     |
| 14362                | C919A             | L307M                    | Interface     |                        | 2                      | 2                     |
| 14371                | G928C             | A310P                    | Interface     | 1                      |                        | 1                     |
| 14396                | C953T             | T318I                    | Interface     |                        | 1                      | 1                     |
| 14398                | G955T             | V319L                    | Interface     |                        | 1                      | 1                     |
| 14407                | C964T             | P322S                    | Interface     |                        | 2                      | 2                     |
| 14408                | C965T             | P322L                    | Interface     | 843                    | 4050                   | 4893                  |
| 14500                | G1057T            | V353L                    | Interface     |                        | 5                      | 5                     |
| 14536                | C1093T            | L365F                    | Interface     |                        | 1                      | 1                     |
| 14557                | G1114T            | V372L                    | Fingers       |                        | 4                      | 4                     |
| 14584                | G1141T            | A381S                    |               |                        | 1                      | 1                     |
| 14585                | C1142T            | A381V                    | Fingers       |                        | 10                     | 10                    |
| 14593                | G1150A            | G384S                    | Fingers       | 1                      |                        | 1                     |
| 14657                | C1214T            | A405V                    | Fingers       |                        | 1                      | 1                     |
| 14708                | C1265T            | A422V                    |               |                        | 1                      | 1                     |
| 14747                | A1304G            | E435G                    | Fingers       |                        | 2                      | 2                     |
| 14768                | C1325T            | A442V                    | Fingers       |                        | 21                     | 21                    |
| 14786                | C1343T            | A448V                    | Fingers       | 3                      | 6                      | 9                     |
| 14821                | C1378T            | P460S                    |               |                        | 1                      | 1                     |
| 14829                | G1386T            | M462I                    | Fingers       |                        | 59                     | 59                    |
| 14831                | G1388T            | C463F                    | Fingers       |                        | 3                      | 3                     |
| 14857                | G1414T            | V472F                    |               |                        | 1                      | 1                     |
| 14870                | A1427G            | D476G                    | Fingers       |                        | 5                      | 5                     |
| 14874                | G1431T            | K477N                    | Fingers       | 1                      |                        | 1                     |
| 14912                | A1469G            | N490S                    | Fingers       | 1                      | 1                      | 2                     |
| 14923                | G1480A            | V494I                    | Fingers       |                        | 2                      | 2                     |

| <b>Genomic Locus</b> | <b>Gene Locus</b> | <b>Amino Acid Change</b> | <b>Domain</b> | <b>Wave 1 (n=1026)</b> | <b>Wave 2 (n=4059)</b> | <b>Total (n=5085)</b> |
|----------------------|-------------------|--------------------------|---------------|------------------------|------------------------|-----------------------|
| 14980                | C1537T            | L513F                    | Fingers       | 1                      | 1                      | 2                     |
| 14990                | A1547G            | D516G                    |               |                        | 1                      | 1                     |
| 15006                | G1563C            | E521D                    | Fingers       | 2                      | 3                      | 5                     |
| 15016                | G1573T            | A525S                    | Fingers       |                        | 3                      | 3                     |
| 15026                | C1583T            | A528V                    | Fingers       | 5                      | 1                      | 6                     |
| 15037                | C1594T            | R532C                    | Fingers       |                        | 1                      | 1                     |
| 15100                | G1657C            | A553P                    | Fingers       |                        | 1                      | 1                     |
| 15101                | C1658T            | A553V                    | Fingers       |                        | 1                      | 1                     |
| 15124                | A1681G            | I561V                    | Fingers       |                        | 2                      | 2                     |
| 15202                | G1759C            | V587L                    | Palm          |                        | 7                      | 7                     |
| 15211                | A1768G            | T590A                    |               |                        | 1                      | 1                     |
| 15226                | G1783A            | G595S                    | Palm          |                        | 1                      | 1                     |
| 15243                | G1800T            | M600I                    | Palm          | 71                     | 4                      | 75                    |
| 15251                | C1808G            | T603S                    | Palm          |                        | 1                      | 1                     |
| 15257                | A1814G            | Y605C                    |               |                        | 1                      | 1                     |
| 15260                | G1817A            | S606N                    | Palm          |                        | 1                      | 1                     |
| 15327                | G1884T            | M628I                    | Fingers       | 3                      | 1                      | 4                     |
| 15328                | C1885T            | L629F                    | Fingers       | 1                      |                        | 1                     |
| 15334                | A1891G            | I631V                    | Fingers       |                        | 1                      | 1                     |
| 15341                | C1898T            | A633V                    | Fingers       |                        | 1                      | 1                     |
| 15352                | C1909T            | L637F                    | Fingers       |                        | 1                      | 1                     |
| 15358                | C1915T            | R639C                    | Fingers       |                        | 1                      | 1                     |
| 15362                | A1919G            | K640R                    | Fingers       |                        | 1                      | 1                     |
| 15364                | C1921G            | H641D                    | Fingers       | 1                      |                        | 1                     |
| 15368                | C1925T            | T642I                    | Fingers       | 1                      |                        | 1                     |
| 15380                | G1937T            | S646I                    | Fingers       | 1                      |                        | 1                     |
| 15386                | C1943T            | S648L                    | Fingers       |                        | 2                      | 2                     |
| 15391                | C1948T            | R650C                    | Fingers       |                        | 1                      | 1                     |
| 15406                | G1963T            | A655S                    | Fingers       |                        | 3                      | 3                     |
| 15407                | C1964T            | A655V                    | Fingers       | 1                      |                        | 1                     |
| 15436                | A1993G            | M665V                    | Fingers       |                        | 2                      | 2                     |
| 15438                | G1995T            | M665I                    | Fingers       |                        | 24                     | 24                    |
| 15452                | G2009T            | G670V                    | Fingers       |                        | 28                     | 28                    |
| 15487                | G2044C            | G682R                    | Palm          |                        | 1                      | 1                     |
| 15497                | C2054A            | T685K                    | Palm          |                        | 1                      | 1                     |
| 15572                | A2129G            | D710G                    | Palm          |                        | 1                      | 1                     |
| 15596                | A2153G            | Y718S                    | Palm          | 2                      |                        | 2                     |
| 15619                | C2176T            | L726F                    | Palm          | 1                      |                        | 1                     |
| 15638                | G2195A            | R732K                    | Palm          | 1                      |                        | 1                     |

| <b>Genomic Locus</b> | <b>Gene Locus</b> | <b>Amino Acid Change</b> | <b>Domain</b> | <b>Wave 1 (n=1026)</b> | <b>Wave 2 (n=4059)</b> | <b>Total (n=5085)</b> |
|----------------------|-------------------|--------------------------|---------------|------------------------|------------------------|-----------------------|
| 15640                | A2197G            | N733D                    | Palm          | 1                      |                        | 1                     |
| 15640                | A2197T            | N733Y                    | Palm          | 1                      |                        | 1                     |
| 15655                | A2212G            | T738A                    | Palm          |                        | 2                      | 2                     |
| 15656                | C2213T            | T738I                    | Palm          |                        | 2                      | 2                     |
| 15658                | G2215A            | D739N                    | Palm          |                        | 2                      | 2                     |
| 15664                | G2221A            | V741M                    | Palm          |                        | 1                      | 1                     |
| 15715                | T2272C            | S758P                    | Palm          |                        | 1                      | 1                     |
| 15760                | G2317A            | G773S                    | Palm          | 1                      |                        | 1                     |
| 15761                | G2318A            | G773D                    | Palm          |                        | 1                      | 1                     |
| 15827                | A2384G            | E795G                    | Palm          | 1                      |                        | 1                     |
| 15848                | C2405T            | T802I                    | Palm          |                        | 1                      | 1                     |
| 15850                | G2407T            | D803Y                    | Palm          |                        | 1                      | 1                     |
| 15853                | C2410T            | L804F                    | Palm          |                        | 2                      | 2                     |
| 15878                | G2435T            | C812F                    | Palm          |                        | 1                      | 1                     |
| 15886                | C2443T            | H815Y                    | Palm          |                        | 1                      | 1                     |
| 15906                | G2463T            | Q821H                    | Thumb         | 1                      | 1                      | 2                     |
| 15908                | G2465T            | G822V                    | Thumb         |                        | 1                      | 1                     |
| 15979                | A2536G            | I846V                    | Thumb         | 4                      |                        | 4                     |
| 16045                | C2602T            | L868F                    | Thumb         |                        | 1                      | 1                     |
| 16084                | C2641T            | H881Y                    | Thumb         |                        | 1                      | 1                     |
| 16148                | A2705G            | Y902C                    | Thumb         |                        | 1                      | 1                     |
| 16163                | C2720T            | T907I                    | Thumb         |                        | 45                     | 45                    |
| 16178                | C2735T            | S912L                    | Thumb         |                        | 2                      | 2                     |
| 16192                | C2749T            | P917S                    | Thumb         |                        | 80                     | 80                    |

1413

1414

**Table 2.** Nonsynonymous SNPs in SARS-CoV-2 spike protein.

| <b>Genomic Locus</b> | <b>Gene Locus</b> | <b>Amino Acid Change</b> | <b>Domain</b> | <b>Wave 1 (n=1026)</b> | <b>Wave 2 (n=4059)</b> | <b>Total (n=5085)</b> |
|----------------------|-------------------|--------------------------|---------------|------------------------|------------------------|-----------------------|
| 21575                | C13T              | L5F                      | S1            | 11                     | 25                     | 36                    |
| 21578                | G16T              | V6F                      | S1            |                        | 1                      | 1                     |
| 21587                | C25T              | P9S                      | S1            | 2                      |                        | 2                     |
| 21588                | C26T              | P9L                      | S1            | 1                      | 1                      | 2                     |
| 21594                | T32C              | V11A                     | S1            |                        | 1                      | 1                     |
| 21597                | C35T              | S12F                     | S1            |                        | 6                      | 6                     |
| 21604                | G42T              | Q14H                     | S1            |                        | 1                      | 1                     |
| 21614                | C52T              | L18F                     | S1 - NTD      | 1                      | 11                     | 12                    |
| 21618                | C56T              | T19I                     | S1 - NTD      | 1                      | 1                      | 2                     |
| 21621                | C59T              | T20I                     | S1 - NTD      |                        | 1                      | 1                     |
| 21624                | G62T              | R21I                     | S1 - NTD      |                        | 6                      | 6                     |
| 21624                | G62A              | R21K                     | S1 - NTD      |                        | 1                      | 1                     |
| 21624                | G62C              | R21T                     | S1 - NTD      |                        | 3                      | 3                     |
| 21627                | C65T              | T22I                     | S1 - NTD      | 2                      | 4                      | 6                     |
| 21638                | C76T              | P26S                     | S1 - NTD      |                        | 17                     | 17                    |
| 21641                | G79T              | A27S                     | S1 - NTD      | 1                      | 1                      | 2                     |
| 21641                | G79A              | A27T                     | S1 - NTD      | 1                      |                        | 1                     |
| 21642                | C80T              | A27V                     | S1 - NTD      |                        | 1                      | 1                     |
| 21648                | C86T              | T29I                     | S1 - NTD      | 1                      | 4                      | 5                     |
| 21707                | C145T             | H49Y                     | S1 - NTD      |                        | 142                    | 142                   |
| 21713                | A151G             | T51A                     | S1 - NTD      |                        | 1                      | 1                     |
| 21724                | G162T             | L54F                     | S1 - NTD      |                        | 11                     | 11                    |
| 21754                | G192T             | W64C                     | S1 - NTD      |                        | 1                      | 1                     |
| 21767                | C205T             | H69Y                     | S1 - NTD      | 1                      | 7                      | 8                     |
| 21770                | G208A             | V70I                     | S1 - NTD      |                        | 1                      | 1                     |
| 21770                | G208T             | V70F                     | S1 - NTD      | 1                      |                        | 1                     |
| 21774                | C212T             | S71F                     | S1 - NTD      |                        | 1                      | 1                     |
| 21784                | T222A             | N74K                     | S1 - NTD      | 1                      |                        | 1                     |
| 21785                | G223C             | G75R                     | S1 - NTD      |                        | 1                      | 1                     |
| 21793                | G231T             | K77N                     | S1 - NTD      |                        | 1                      | 1                     |
| 21824                | G262A             | D88N                     | S1 - NTD      |                        | 1                      | 1                     |
| 21834                | A272T             | Y91F                     | S1 - NTD      |                        | 1                      | 1                     |
| 21846                | C284T             | T95I                     | S1 - NTD      | 1                      | 10                     | 11                    |
| 21852                | A290G             | K97R                     | S1 - NTD      |                        | 1                      | 1                     |
| 21855                | C293T             | S98F                     | S1 - NTD      | 1                      | 2                      | 3                     |
| 21861                | T299C             | I100T                    | S1 - NTD      |                        | 2                      | 2                     |



| <b>Genomic Locus</b> | <b>Gene Locus</b> | <b>Amino Acid Change</b> | <b>Domain</b> | <b>Wave 1 (n=1026)</b> | <b>Wave 2 (n=4059)</b> | <b>Total (n=5085)</b> |
|----------------------|-------------------|--------------------------|---------------|------------------------|------------------------|-----------------------|
| 21918                | T356C             | I119T                    | S1 - NTD      | 1                      |                        | 1                     |
| 21930                | C368T             | A123V                    | S1 - NTD      |                        | 1                      | 1                     |
| 21941                | G379T             | V127F                    | S1 - NTD      |                        | 1                      | 1                     |
| 21942                | T380C             | V127A                    | S1 - NTD      |                        | 4                      | 4                     |
| 21974                | G412T             | D138Y                    | S1 - NTD      | 2                      |                        | 2                     |
| 21985                | G423T             | L141F                    | S1 - NTD      |                        | 1                      | 1                     |
| 21986                | G424A             | G142S                    | S1 - NTD      |                        | 2                      | 2                     |
| 21993                | A431G             | Y144C                    | S1 - NTD      | 1                      |                        | 1                     |
| 21995                | T433C             | Y145H                    | S1 - NTD      | 2                      |                        | 2                     |
| 21998                | C436T             | H146Y                    | S1 - NTD      | 1                      | 2                      | 3                     |
| 22014                | G452A             | S151N                    | S1 - NTD      |                        | 1                      | 1                     |
| 22014                | G452T             | S151I                    | S1 - NTD      |                        | 2                      | 2                     |
| 22017                | G455T             | W152L                    | S1 - NTD      | 1                      | 1                      | 2                     |
| 22021                | G459T             | M153I                    | S1 - NTD      |                        | 1                      | 1                     |
| 22021                | G459A             | M153I                    | S1 - NTD      |                        | 1                      | 1                     |
| 22022                | G460A             | E154K                    | S1 - NTD      |                        | 1                      | 1                     |
| 22028                | G466C             | E156Q                    | S1 - NTD      | 2                      |                        | 2                     |
| 22037                | G475A             | V159I                    | S1 - NTD      | 1                      |                        | 1                     |
| 22097                | C535T             | L179F                    | S1 - NTD      |                        | 1                      | 1                     |
| 22104                | G542T             | G181V                    | S1 - NTD      |                        | 1                      | 1                     |
| 22107                | A545G             | K182R                    | S1 - NTD      |                        | 1                      | 1                     |
| 22135                | A573T             | E191D                    | S1 - NTD      |                        | 1                      | 1                     |
| 22139                | G577T             | V193L                    | S1 - NTD      |                        | 1                      | 1                     |
| 22150                | T588G             | N196K                    | S1 - NTD      | 1                      |                        | 1                     |
| 22175                | T613G             | S205A                    | S1 - NTD      |                        | 1                      | 1                     |
| 22205                | G643T             | D215Y                    | S1 - NTD      |                        | 1                      | 1                     |
| 22206                | A644G             | D215G                    | S1 - NTD      |                        | 2                      | 2                     |
| 22214                | C652G             | Q218E                    | S1 - NTD      |                        | 1                      | 1                     |
| 22227                | C665T             | A222V                    | S1 - NTD      |                        | 1                      | 1                     |
| 22241                | G679A             | V227I                    | S1 - NTD      |                        | 2                      | 2                     |
| 22242                | T680C             | V227A                    | S1 - NTD      | 1                      |                        | 1                     |
| 22244                | G682C             | D228H                    | S1 - NTD      |                        | 2                      | 2                     |
| 22245                | A683G             | D228G                    | S1 - NTD      | 1                      |                        | 1                     |
| 22246                | T684G             | D228E                    | S1 - NTD      | 2                      |                        | 2                     |
| 22248                | T686G             | L229W                    | S1 - NTD      | 1                      |                        | 1                     |
| 22250                | C688A             | P230T                    | S1 - NTD      | 1                      |                        | 1                     |
| 22253                | A691G             | I231V                    | S1 - NTD      | 1                      |                        | 1                     |

| <b>Genomic Locus</b> | <b>Gene Locus</b> | <b>Amino Acid Change</b> | <b>Domain</b> | <b>Wave 1 (n=1026)</b> | <b>Wave 2 (n=4059)</b> | <b>Total (n=5085)</b> |
|----------------------|-------------------|--------------------------|---------------|------------------------|------------------------|-----------------------|
| 22254                | T692C             | I231T                    | S1 - NTD      | 1                      |                        | 1                     |
| 22259                | A697G             | I233V                    | S1 - NTD      | 1                      |                        | 1                     |
| 22260                | T698C             | I233T                    | S1 - NTD      | 1                      |                        | 1                     |
| 22262                | A700G             | N234D                    | S1 - NTD      | 1                      |                        | 1                     |
| 22266                | T704C             | I235T                    | S1 - NTD      | 1                      |                        | 1                     |
| 22281                | C719T             | T240I                    | S1 - NTD      |                        | 5                      | 5                     |
| 22286                | C724T             | L242F                    | S1 - NTD      |                        | 1                      | 1                     |
| 22295                | C733T             | H245Y                    | S1 - NTD      |                        | 2                      | 2                     |
| 22304                | T742C             | Y248H                    | S1 - NTD      |                        | 3                      | 3                     |
| 22311                | C749T             | T250I                    | S1 - NTD      | 1                      | 4                      | 5                     |
| 22313                | C751T             | P251S                    | S1 - NTD      |                        | 2                      | 2                     |
| 22320                | A758G             | D253G                    | S1 - NTD      |                        | 2                      | 2                     |
| 22320                | A758C             | D253A                    | S1 - NTD      | 1                      |                        | 1                     |
| 22323                | C761T             | S254F                    | S1 - NTD      |                        | 3                      | 3                     |
| 22329                | C767T             | S256L                    | S1 - NTD      | 1                      |                        | 1                     |
| 22335                | G773T             | W258L                    | S1 - NTD      | 1                      |                        | 1                     |
| 22344                | G782T             | G261V                    | S1 - NTD      | 3                      |                        | 3                     |
| 22346                | G784T             | A262S                    | S1 - NTD      |                        | 4                      | 4                     |
| 22350                | C788T             | A263V                    | S1 - NTD      | 1                      |                        | 1                     |
| 22382                | A820G             | T274A                    | S1 - NTD      |                        | 1                      | 1                     |
| 22398                | A836T             | Y279F                    | S1 - NTD      | 1                      |                        | 1                     |
| 22408                | T846G             | N282K                    | S1 - NTD      |                        | 1                      | 1                     |
| 22425                | C863T             | A288V                    | S1 - NTD      |                        | 1                      | 1                     |
| 22430                | G868T             | D290Y                    | S1 - NTD      | 1                      |                        | 1                     |
| 22484                | G922T             | V308L                    | S1            |                        | 3                      | 3                     |
| 22487                | G925C             | E309Q                    | S1            |                        | 1                      | 1                     |
| 22532                | G970C             | E324Q                    | S1            |                        | 1                      | 1                     |
| 22533                | A971T             | E324V                    | S1            |                        | 1                      | 1                     |
| 22535                | T973C             | S325P                    | S1            |                        | 1                      | 1                     |
| 22536                | C974T             | S325F                    | S1            |                        | 1                      | 1                     |
| 22550                | C988T             | P330S                    | S1 - RBD      |                        | 2                      | 2                     |
| 22574                | T1012C            | F338L                    | S1 - RBD      | 1                      |                        | 1                     |
| 22608                | C1046T            | S349F                    | S1 - RBD      |                        | 1                      | 1                     |
| 22616                | G1054T            | A352S                    | S1 - RBD      |                        | 7                      | 7                     |
| 22661                | G1099T            | V367F                    | S1 - RBD      |                        | 1                      | 1                     |
| 22673                | T1111C            | S371P                    | S1 - RBD      |                        | 3                      | 3                     |
| 22679                | T1117C            | S373P                    | S1 - RBD      |                        | 1                      | 1                     |

| <b>Genomic Locus</b> | <b>Gene Locus</b> | <b>Amino Acid Change</b> | <b>Domain</b> | <b>Wave 1 (n=1026)</b> | <b>Wave 2 (n=4059)</b> | <b>Total (n=5085)</b> |
|----------------------|-------------------|--------------------------|---------------|------------------------|------------------------|-----------------------|
| 22712                | C1150T            | P384S                    | S1 - RBD      |                        | 1                      | 1                     |
| 22716                | C1154T            | T385I                    | S1 - RBD      | 3                      |                        | 3                     |
| 22785                | G1223C            | R408T                    | S1 - RBD      |                        | 1                      | 1                     |
| 22793                | G1231T            | A411S                    | S1 - RBD      |                        | 1                      | 1                     |
| 22818                | C1256T            | A419V                    | S1 - RBD      | 1                      |                        | 1                     |
| 22895                | G1333T            | V445F                    | S1 - RBD      |                        | 1                      | 1                     |
| 22899                | G1337T            | G446V                    | S1 - RBD      | 2                      |                        | 2                     |
| 22928                | T1366C            | F456L                    | S1 - RBD      | 1                      |                        | 1                     |
| 23001                | G1439T            | C480F                    | S1 - RBD      |                        | 1                      | 1                     |
| 23012                | G1450C            | E484Q                    | S1 - RBD      | 1                      |                        | 1                     |
| 23046                | A1484C            | Y495S                    | S1 - RBD      |                        | 1                      | 1                     |
| 23111                | C1549T            | L517F                    | S1 - RBD      |                        | 1                      | 1                     |
| 23120                | G1558T            | A520S                    | S1 - RBD      | 1                      | 6                      | 7                     |
| 23121                | C1559T            | A520V                    | S1 - RBD      |                        | 1                      | 1                     |
| 23127                | C1565T            | A522V                    | S1 - RBD      | 1                      | 1                      | 2                     |
| 23145                | A1583G            | K528R                    | S1 - RBD      |                        | 2                      | 2                     |
| 23149                | G1587T            | K529N                    | S1            |                        | 1                      | 1                     |
| 23170                | C1608A            | N536K                    | S1            |                        | 1                      | 1                     |
| 23202                | C1640A            | T547K                    | S1            |                        | 2                      | 2                     |
| 23202                | C1640T            | T547I                    | S1            |                        | 1                      | 1                     |
| 23223                | A1661T            | E554V                    | S1            |                        | 2                      | 2                     |
| 23224                | G1662T            | E554D                    | S1            | 4                      | 31                     | 35                    |
| 23270                | G1708T            | A570S                    | S1            |                        | 3                      | 3                     |
| 23277                | C1715T            | T572I                    | S1            | 5                      | 5                      | 10                    |
| 23282                | G1720T            | D574Y                    | S1            |                        | 1                      | 1                     |
| 23292                | G1730T            | R577L                    | S1            | 1                      |                        | 1                     |
| 23311                | G1749T            | E583D                    | S1            |                        | 6                      | 6                     |
| 23312                | A1750G            | I584V                    | S1            |                        | 1                      | 1                     |
| 23315                | C1753T            | L585F                    | S1            | 1                      | 7                      | 8                     |
| 23349                | G1787A            | S596N                    | S1            |                        | 1                      | 1                     |
| 23373                | C1811T            | T604I                    | S1            |                        | 2                      | 2                     |
| 23380                | C1818A            | N606K                    | S1            |                        | 2                      | 2                     |
| 23403                | A1841G            | D614G                    | S1            | 841                    | 4054                   | 4895                  |
| 23426                | G1864T            | V622F                    | S1            |                        | 2                      | 2                     |
| 23426                | G1864C            | V622L                    | S1            |                        | 2                      | 2                     |
| 23435                | C1873T            | H625Y                    | S1            |                        | 1                      | 1                     |
| 23439                | C1877T            | A626V                    | S1            |                        | 1                      | 1                     |

| <b>Genomic Locus</b> | <b>Gene Locus</b> | <b>Amino Acid Change</b> | <b>Domain</b> | <b>Wave 1 (n=1026)</b> | <b>Wave 2 (n=4059)</b> | <b>Total (n=5085)</b> |
|----------------------|-------------------|--------------------------|---------------|------------------------|------------------------|-----------------------|
| 23444                | C1882G            | Q628E                    | S1            |                        | 7                      | 7                     |
| 23453                | C1891T            | P631S                    | S1            | 1                      |                        | 1                     |
| 23457                | C1895T            | T632I                    | S1            |                        | 1                      | 1                     |
| 23481                | C1919T            | S640F                    | S1            | 1                      | 42                     | 43                    |
| 23486                | G1924T            | V642F                    | S1            |                        | 1                      | 1                     |
| 23502                | C1940T            | A647V                    | S1            |                        | 1                      | 1                     |
| 23536                | C1974A            | N658K                    | S1            |                        | 4                      | 4                     |
| 23564                | G2002T            | A668S                    | S1            |                        | 1                      | 1                     |
| 23586                | A2024G            | Q675R                    | S1            |                        | 14                     | 14                    |
| 23587                | G2025C            | Q675H                    | S1            |                        | 1                      | 1                     |
| 23587                | G2025T            | Q675H                    | S1            |                        | 4                      | 4                     |
| 23589                | C2027T            | T676I                    | S1            | 1                      | 2                      | 3                     |
| 23593                | G2031T            | Q677H                    | S1            | 1                      | 1                      | 2                     |
| 23595                | C2033T            | T678I                    | S1            | 1                      |                        | 1                     |
| 23624                | G2062T            | A688S                    | S2            |                        | 4                      | 4                     |
| 23625                | C2063T            | A688V                    | S2            |                        | 16                     | 16                    |
| 23655                | C2093T            | S698L                    | S2            |                        | 1                      | 1                     |
| 23664                | C2102T            | A701V                    | S2            |                        | 21                     | 21                    |
| 23670                | A2108G            | N703S                    | S2            |                        | 1                      | 1                     |
| 23679                | C2117T            | A706V                    | S2            |                        | 1                      | 1                     |
| 23684                | T2122C            | S708P                    | S2            |                        | 1                      | 1                     |
| 23709                | C2147T            | T716I                    | S2            |                        | 1                      | 1                     |
| 23718                | C2156T            | T719I                    | S2            |                        | 1                      | 1                     |
| 23745                | C2183T            | P728L                    | S2            | 1                      |                        | 1                     |
| 23755                | G2193T            | M731I                    | S2            | 3                      | 1                      | 4                     |
| 23798                | T2236C            | S746P                    | S2            |                        | 1                      | 1                     |
| 23802                | C2240T            | T747I                    | S2            |                        | 1                      | 1                     |
| 23804                | G2242A            | E748K                    | S2            |                        | 1                      | 1                     |
| 23832                | G2270T            | G757V                    | S2            |                        | 1                      | 1                     |
| 23856                | G2294T            | R765L                    | S2            |                        | 1                      | 1                     |
| 23868                | G2306T            | G769V                    | S2            |                        | 3                      | 3                     |
| 23873                | G2311T            | A771S                    | S2            |                        | 8                      | 8                     |
| 23877                | T2315C            | V772A                    | S2            |                        | 1                      | 1                     |
| 23895                | C2333T            | T778I                    | S2            |                        | 1                      | 1                     |
| 23900                | G2338C            | E780Q                    | S2            |                        | 1                      | 1                     |
| 23936                | C2374T            | P792S                    | S2            |                        | 1                      | 1                     |

| <b>Genomic Locus</b> | <b>Gene Locus</b> | <b>Amino Acid Change</b> | <b>Domain</b> | <b>Wave 1 (n=1026)</b> | <b>Wave 2 (n=4059)</b> | <b>Total (n=5085)</b> |
|----------------------|-------------------|--------------------------|---------------|------------------------|------------------------|-----------------------|
| 23948                | G2386T            | D796Y                    | S2            |                        | 2                      | 2                     |
| 23955                | G2393T            | G798V                    | S2            | 1                      |                        | 1                     |
| 23987                | C2425T            | P809S                    | S2            |                        | 2                      | 2                     |
| 23988                | C2426T            | P809L                    | S2            |                        | 1                      | 1                     |
| 23997                | C2435T            | P812L                    | S2            |                        | 1                      | 1                     |
| 24003                | A2441G            | K814R                    | S2            |                        | 1                      | 1                     |
| 24014                | A2452G            | I818V                    | S2 - FP       |                        | 5                      | 5                     |
| 24026                | C2464T            | L822F                    | S2 - FP       |                        | 97                     | 97                    |
| 24041                | A2479T            | T827S                    | S2 - FP       |                        | 4                      | 4                     |
| 24077                | G2515T            | D839Y                    | S2            | 2                      |                        | 2                     |
| 24089                | G2527A            | D843N                    | S2            | 1                      | 1                      | 2                     |
| 24095                | G2533T            | A845S                    | S2            |                        | 5                      | 5                     |
| 24099                | C2537T            | A846V                    | S2            |                        | 1                      | 1                     |
| 24129                | A2567G            | N856S                    | S2            |                        | 7                      | 7                     |
| 24138                | C2576T            | T859I                    | S2            |                        | 5                      | 5                     |
| 24141                | T2579C            | V860A                    | S2            |                        | 1                      | 1                     |
| 24170                | A2608G            | I870V                    | S2            |                        | 3                      | 3                     |
| 24188                | G2626T            | A876S                    | S2            |                        | 1                      | 1                     |
| 24197                | G2635T            | A879S                    | S2            |                        | 31                     | 31                    |
| 24198                | C2636T            | A879V                    | S2            |                        | 1                      | 1                     |
| 24212                | T2650G            | S884A                    | S2            |                        | 11                     | 11                    |
| 24237                | C2675T            | A892V                    | S2            |                        | 1                      | 1                     |
| 24240                | C2678T            | A893V                    | S2            | 1                      |                        | 1                     |
| 24268                | G2706T            | M902I                    | S2            |                        | 1                      | 1                     |
| 24287                | A2725G            | I909V                    | S2 - HR1      |                        | 2                      | 2                     |
| 24314                | G2752C            | E918Q                    | S2 - HR1      | 1                      |                        | 1                     |
| 24328                | G2766C            | L922F                    | S2 - HR1      |                        | 2                      | 2                     |
| 24348                | G2786T            | S929I                    | S2 - HR1      |                        | 1                      | 1                     |
| 24356                | G2794T            | G932C                    | S2 - HR1      |                        | 1                      | 1                     |
| 24357                | G2795T            | G932V                    | S2 - HR1      |                        | 1                      | 1                     |
| 24368                | G2806A            | D936N                    | S2 - HR1      |                        | 3                      | 3                     |
| 24368                | G2806C            | D936H                    | S2 - HR1      |                        | 1                      | 1                     |
| 24368                | G2806T            | D936Y                    | S2 - HR1      | 3                      | 4                      | 7                     |
| 24374                | C2812T            | L938F                    | S2 - HR1      |                        | 3                      | 3                     |
| 24378                | C2816T            | S939F                    | S2 - HR1      |                        | 4                      | 4                     |
| 24380                | T2818G            | S940A                    | S2 - HR1      |                        | 5                      | 5                     |
| 24389                | A2827G            | S943G                    | S2 - HR1      |                        | 6                      | 6                     |

| <b>Genomic Locus</b> | <b>Gene Locus</b> | <b>Amino Acid Change</b> | <b>Domain</b> | <b>Wave 1 (n=1026)</b> | <b>Wave 2 (n=4059)</b> | <b>Total (n=5085)</b> |
|----------------------|-------------------|--------------------------|---------------|------------------------|------------------------|-----------------------|
| 24463                | C2901A            | S967R                    | S2 - HR1      | 2                      |                        | 2                     |
| 24507                | C2945T            | S982L                    | S2 - HR1      |                        | 1                      | 1                     |
| 24579                | C3017T            | T1006I                   | S2 - CH       |                        | 1                      | 1                     |
| 24588                | C3026G            | T1009S                   | S2 - CH       |                        | 1                      | 1                     |
| 24621                | C3059T            | A1020V                   | S2 - CH       | 1                      |                        | 1                     |
| 24638                | G3076T            | A1026S                   | S2 - CH       |                        | 2                      | 2                     |
| 24642                | C3080T            | T1027I                   | S2 - CH       | 5                      |                        | 5                     |
| 24649                | G3087T            | M1029I                   | S2 - CH       |                        | 1                      | 1                     |
| 24710                | A3148T            | M1050L                   | S2            |                        | 1                      | 1                     |
| 24710                | A3148G            | M1050V                   | S2            | 1                      | 1                      | 2                     |
| 24712                | G3150T            | M1050I                   | S2            |                        | 2                      | 2                     |
| 24718                | C3156A            | F1052L                   | S2            | 1                      | 166                    | 167                   |
| 24770                | G3208T            | A1070S                   | S2            |                        | 2                      | 2                     |
| 24794                | G3232T            | A1078S                   | S2 - CD       | 3                      | 2                      | 5                     |
| 24812                | G3250T            | D1084Y                   | S2 - CD       | 1                      | 29                     | 30                    |
| 24834                | G3272T            | R1091L                   | S2 - CD       | 1                      |                        | 1                     |
| 24867                | G3305T            | W1102L                   | S2 - CD       |                        | 1                      | 1                     |
| 24872                | G3310T            | V1104L                   | S2 - CD       |                        | 1                      | 1                     |
| 24893                | G3331C            | E1111Q                   | S2 - CD       |                        | 2                      | 2                     |
| 24897                | C3335T            | P1112L                   | S2 - CD       | 2                      | 2                      | 4                     |
| 24912                | C3350T            | T1117I                   | S2 - CD       |                        | 1                      | 1                     |
| 24923                | T3361C            | F1121L                   | S2 - CD       |                        | 2                      | 2                     |
| 24933                | G3371T            | G1124V                   | S2 - CD       | 1                      | 2                      | 3                     |
| 24959                | G3397T            | V1133F                   | S2 - CD       |                        | 1                      | 1                     |
| 24977                | G3415T            | D1139Y                   | S2 - CD       |                        | 1                      | 1                     |
| 24986                | C3424A            | Q1142K                   | S2            | 1                      |                        | 1                     |
| 24998                | G3436T            | D1146Y                   | S2            |                        | 4                      | 4                     |
| 24998                | G3436C            | D1146H                   | S2            |                        | 13                     | 13                    |
| 25019                | G3457T            | D1153Y                   | S2            |                        | 11                     | 11                    |
| 25032                | A3470T            | K1157M                   | S2            | 1                      |                        | 1                     |
| 25046                | C3484T            | P1162S                   | S2            |                        | 5                      | 5                     |
| 25047                | C3485T            | P1162L                   | S2            |                        | 3                      | 3                     |
| 25050                | A3488T            | D1163V                   | S2            |                        | 2                      | 2                     |
| 25088                | G3526T            | V1176F                   | S2            |                        | 18                     | 18                    |
| 25101                | A3539G            | Q1180R                   | S2            |                        | 1                      | 1                     |
| 25104                | A3542G            | K1181R                   | S2            |                        | 4                      | 4                     |
| 25116                | G3554A            | R1185H                   | S2            |                        | 2                      | 2                     |

| Genomic Locus | Gene Locus | Amino Acid Change | Domain | Wave 1 (n=1026) | Wave 2 (n=4059) | Total (n=5085) |
|---------------|------------|-------------------|--------|-----------------|-----------------|----------------|
| 25121         | A3559T     | N1187Y            | S2     |                 | 1               | 1              |
| 25135         | G3573T     | K1191N            | S2     |                 | 1               | 1              |
| 25137         | A3575C     | N1192T            | S2     | 1               |                 | 1              |
| 25158         | A3596C     | D1199A            | S2     |                 | 1               | 1              |
| 25160         | C3598T     | L1200F            | S2     |                 | 1               | 1              |
| 25163         | C3601A     | Q1201K            | S2     |                 | 1               | 1              |
| 25169         | C3607T     | L1203F            | S2     | 1               |                 | 1              |
| 25183         | G3621T     | E1207D            | S2     |                 | 1               | 1              |
| 25186         | G3624T     | Q1208H            | S2     | 1               |                 | 1              |
| 25217         | G3655T     | G1219C            | S2     | 1               | 3               | 4              |
| 25234         | G3672T     | L1224F            | S2     |                 | 1               | 1              |
| 25241         | A3679G     | I1227V            | S2     | 1               |                 | 1              |
| 25244         | G3682T     | V1228L            | S2     |                 | 2               | 2              |
| 25249         | G3687T     | M1229I            | S2     |                 | 1               | 1              |
| 25249         | G3687C     | M1229I            | S2     |                 | 2               | 2              |
| 25250         | G3688A     | V1230M            | S2     |                 | 1               | 1              |
| 25266         | G3704T     | C1235F            | S2     |                 | 4               | 4              |
| 25273         | G3711T     | M1237I            | S2     |                 | 2               | 2              |
| 25284         | G3722T     | C1241F            | S2     |                 | 1               | 1              |
| 25287         | G3725T     | S1242I            | S2     |                 | 4               | 4              |
| 25297         | G3735T     | K1245N            | S2     |                 | 1               | 1              |
| 25301         | T3739G     | C1247G            | S2     |                 | 1               | 1              |
| 25302         | G3740T     | C1247F            | S2     |                 | 4               | 4              |
| 25305         | G3743T     | C1248F            | S2     |                 | 2               | 2              |
| 25317         | C3755T     | S1252F            | S2     |                 | 1               | 1              |
| 25340         | G3778T     | D1260Y            | S2     |                 | 2               | 2              |
| 25350         | C3788T     | P1263L            | S2     | 1               | 2               | 3              |
| 25352         | G3790T     | V1264L            | S2     |                 | 1               | 1              |
| 25365         | T3803C     | V1268A            | S2     |                 | 1               | 1              |

1416

1417 The domain region of RBD is based on structural information found in Cai et al.  
1418 2020 (98).

1419

1420

1421 Forty-nine of these amino acid replacements (V11A, T51A, W64C, I119T,  
1422 E156Q, S205A, D228G, L229W, P230T, N234D, I235T, T274A, A288V, E324Q,  
1423 E324V, S325P, S349F, S371P, S373P, T385I, A419V, C480F, Y495S, L517F,  
1424 K528R, Q628E, T632I, S708P, T719I, P728L, S746P, E748K, G757V, V772A,

1425 K814R, D843N, S884A, M902I, I909V, E918Q, S982L, M1029I, Q1142K,  
1426 K1157M, Q1180R, D1199A, C1241F, C1247G, and V1268A) were not  
1427 represented in a publicly available database (34) as of August 19, 2020



1428
